# 1 Activity of Estrogen Receptor $\beta$ Agonists in Therapy-Resistant Estrogen Receptor-Positive 2 Breast Cancer

3 Jharna Datta<sup>1</sup>, Natalie Willingham<sup>1</sup>, Jasmine M. Manouchehri<sup>1</sup>, Patrick Schnell<sup>1,2</sup>, Mirisha Sheth<sup>1</sup>,  
4 Joel J. David<sup>1</sup>, Mahmoud Kassem<sup>1, 2</sup>, Tyler A. Wilson<sup>1,4</sup>, Hanna S. Radomska<sup>5</sup>, Christopher C.  
5 Coss<sup>1,5,6</sup>, Chad E. Bennett<sup>1,4,6</sup>, Ramesh K. Ganju<sup>1</sup>, Sagar D. Sardesai<sup>1,2</sup>, Maryam Lustberg<sup>3</sup>,  
6 Bhuvaneshwari Ramaswamy<sup>1,2</sup>, Daniel G. Stover<sup>1,2</sup>, Mathew A. Cherian<sup>1, 2\*</sup>

7 <sup>1</sup> Comprehensive Cancer Center, The Ohio State University Wexner Medical Center, Columbus,  
8 OH 43210, USA

9 <sup>2</sup>Stefanie Spielman Comprehensive Breast Cancer, The Ohio State University, Columbus, OH  
10 43210, USA

11 <sup>3</sup>Yale Cancer Center, Yale School of Medicine, New Haven, CT, 06520, USA

12 <sup>4</sup>Medicinal Chemistry Shared Resource, Comprehensive Cancer Center, The Ohio State University  
13 Wexner Medical Center, Columbus, OH 43210, USA

14 <sup>5</sup>Division of Pharmaceutics and Pharmacology, College of Pharmacy, The Ohio State University,  
15 Columbus, OH 43210, USA

16 <sup>6</sup>Drug Development Institute, The Ohio State University, Columbus, OH 43210, USA

## 17 \* Correspondence:

18 Mathew Cherian

19 mathew.cherian@osumc.edu

20 **Keywords:** ER $\alpha$ , ER $\beta$ , ER+ breast cancer, OSU-ERb-12, LY500307

## 21 Abstract

22 **Background:** Among women, breast cancer is the leading cause of cancer-related death  
23 worldwide. Estrogen receptor  $\alpha$  positive (ER $\alpha$ +) breast cancer accounts for 70% of all breast  
24 cancer subtypes. Although ER $\alpha$  breast cancer initially responds to estrogen deprivation or  
25 blockade, resistance emergence compelling the use of more aggressive therapies. While ER $\alpha$  is a  
26 driver in ER $\alpha$  breast cancer, ER $\beta$  plays an inhibitory role in several different cancer types. To  
27 date, the lack of highly selective ER $\beta$  agonists without ER $\alpha$  activity has limited the exploration  
28 of ER $\beta$  activation as a strategy for ER $\alpha$  breast cancer.

29 **Methods:** We measured expression levels of ESR1 and ESR2 genes in immortalized mammary  
30 epithelial cells and different breast cancer cell lines. The viability of ER $\alpha$  breast cancer cell  
31 lines upon treatments with specific ER $\beta$  agonists, including OSU-ERb-12 and LY500307 was  
32 assessed. The specificity of the ER $\beta$  agonists, OSU-ERb-12 and LY500307, was confirmed by  
33 reporter assays. The effects of the agonists on cell proliferation, cell cycle, apoptosis, colony  
34 formation, cell migration, and expression of tumor suppressor proteins were analyzed. The  
35 expression of ESR2 and genes containing ERE-AP1 composite response elements was examined  
36 in ER $\alpha$  human breast cancer samples to determine the correlation between ESR2 expression  
37 and overall survival and that of putative ESR2 regulated genes.

38 **Results:** In this study, we demonstrate the efficacy of highly selective ER $\beta$  agonists in ER $\alpha$  breast  
39 cancer cell lines and drug-resistant derivatives. ER $\beta$  agonists blocked cell proliferation,  
40 migration and colony formation; and induced apoptosis and S and/or G2/M cell cycle arrest of

41 ER $\alpha$ + breast cancer cell lines. Also, increases in the expression of the key tumor suppressors  
42 FOXO1 and FOXO3a were noted. Importantly, the strong synergy between ER $\beta$  agonists and  
43 ER $\alpha$  antagonists suggested that the efficacy of ER $\beta$  agonists is maximized by combination with  
44 ER $\alpha$  blockade. Lastly, ESR2 (ER $\beta$  gene) expression was negatively correlated with ESR1 (ER $\alpha$   
45 gene) and CCND1 RNA expression in human metastatic ER+/HER2- breast cancer samples.

46 **Conclusion:** Our results demonstrate that highly selective ER $\beta$  agonists attenuate the viability of  
47 ER $\alpha$ + breast cancer cell lines *in vitro* and suggest that this therapeutic strategy merits further  
48 evaluation for ER $\alpha$ + breast cancer.

## 49 Introduction

50 Breast cancer is the most prevalent cancer among women globally (1). It is the second leading  
51 cause of cancer-related deaths among women. In 2020, there were 2.3 million new breast cancer  
52 cases and 685,000 breast cancer deaths worldwide. Despite advances in diagnostic procedures and  
53 improved therapies, globally breast cancer-related morbidity and mortality are on the rise. The  
54 majority of breast cancer-related deaths occur due to distant metastasis. About 60% of metastatic  
55 breast cancers (MBC) are estrogen receptor  $\alpha$  positive (ER $\alpha$ +) and human epidermal growth factor  
56 receptor 2 non-amplified (HER2-) (2). Although the development of effective estrogen blocking  
57 agents and cyclin-dependent kinase 4/6 inhibitors (CDK4/6i) has doubled progression-free  
58 survival on first-line therapy of ER $\alpha$ +HER2- MBC, endocrine and CDK4/6i resistance emerges  
59 causing disease progression. Appropriate post-CDK4/6i therapy is poorly defined due to  
60 incomplete understanding of CDK4/6i resistance, lack of effective agents and lack of clinical trials  
61 that address this important issue.

62 While augmented signaling through receptor tyrosine kinases, *NFI* loss, *C-MYC* amplification and  
63 activating mutations in the *ESR1* gene result in endocrine resistance, alterations of cell cycle genes  
64 cause CDK4/6i resistance (3-5). Due to redundancy and cross talk in these signaling pathways,  
65 attempts to counter therapeutic resistance by focusing on a single target have been mostly  
66 ineffective. Thus, there is an urgent need to develop novel therapeutic options in the second-line  
67 setting to improve the survival and response rate for this aggressive endocrine and CDK4/6i  
68 resistant MBC.

69 Estrogens play a vital role in breast tumorigenesis (6, 7). The stimulatory or repressive effects of  
70 estrogens are mediated through ER $\alpha$  and ER $\beta$ , which are gene products of *ESR1* and *ESR2*,  
71 respectively, and the G protein-coupled estrogen receptor (GPCR30). Unlike ER $\alpha$ , which has a  
72 clear oncogenic role in ER $\alpha$ + breast cancer, ER $\beta$  behaves like a tumor suppressor in many  
73 biological contexts. For example, the tumor-suppressive function of ER $\beta$  was demonstrated  
74 through its knockdown in ER $\alpha$ + cell lines, which induced an invasive phenotype, increased  
75 anchorage-dependent cell proliferation, and elevated EGF-R signaling (8). In the presence of  
76 estradiol, ER $\beta$  overexpression reduced cell proliferation *in vitro* and tumor formation *in vivo*,  
77 effects that are in contradistinction to those of ER $\alpha$  (9, 10). In these experiments ER $\beta$  also was  
78 shown to repress the expression of oncogenes such as c-myc and cyclin D1.

79 The transcriptional function of ERs involves their binding to estrogen response elements (ERE)  
80 within promoters and enhancers (11). There are multiple conformations of EREs in the human  
81 genome, including consensus and non-consensus EREs, single and multiple binding site, and

82 composite EREs consisting of ERE half-sites in combination with binding sites for other  
83 transcription factors such as AP1 and Sp1. Although both the receptors exhibit transcriptional  
84 activity, they differ in their modes of transcriptional activation (12). Studies demonstrated that on  
85 certain E2 responsive ERE-AP-1 composite promoters, ER $\beta$  actually antagonizes the effects of  
86 ER $\alpha$  (13). For example, the cyclin D1 (*CCND1*) promoter, containing cAMP response element  
87 and an AP-1 binding site, is activated by estradiol in cells overexpressing ER $\alpha$  but is inhibited in  
88 cells overexpressing ER $\beta$  (13).

89 *ESR2* was discovered more than twenty years ago (14) but its clinical application was limited by  
90 the lack of highly selective ER $\beta$  agonists. Although, both ER $\alpha$  and ER $\beta$  are activated by binding  
91 to endogenous estrogens, the development of several highly selective synthetic ligands of ER $\alpha$  or  
92 ER $\beta$  has uncovered new avenues to probe the function of these receptors (15).

93 In the present study, we investigated the effects of a novel and highly selective ER $\beta$  selective  
94 agonist, OSU-ERb-12 (16), to inhibit preclinical models of ER $\alpha$ + breast cancer and to counter  
95 endocrine and CDK4/6i resistance *in vitro*. We found that treatment of ER $\alpha$ + breast cancer cell  
96 lines with OSU-ERb-12 caused apoptosis, induced cell cycle arrest (at S phase), as well as  
97 decreased cell proliferation, colony formation, and cell migration. FOXO1 and FOXO3a protein  
98 expression was significantly increased in cells treated with OSU-ERb-12, a potential mechanism  
99 for its tumor-suppressive effects (17).

## 100 **Materials and Methods**

### 101 *Chemicals, drugs, plasmids, antibodies, primers and synthesis of MCSR-18-006*

102 OSU-ERb-12 was synthesized in the Drug Development Institute (DDI) at OSU according to the  
103 procedure outlined before (16). LY500307 was also obtained from DDI, OSU. AC186 (cat#  
104 5053), WAY200076 (cat# 3366), diarylpropionitrile (DPN; cat# 1494), 4-hydroxy-tamoxifen  
105 (Tam; cat# 3412/10), fulvestrant (Fas; cat# 10-471-0), and 1,3-Bis(4-hydroxyphenyl)-4-methyl-5-  
106 [4-(2-piperidinylethoxy)phenol]-1*H*-pyrazoledihydro- chloride (MPP; cat# 1991) were purchased  
107 from Tocris Bioscience. Elacestrant (RAD1901; cat# S9629) was purchased from *Selleckchem*.  
108 Abemaciclib (LY2835219; cat# 17740) was obtained from Cayman Chemical. Stock solutions (10  
109 mmol/L) of the inhibitors were prepared in DMSO. CellTiter-Glo reagent (cat# G7570) and Dual-  
110 Luciferase Assay reagent (cat# E1960) were purchased from Promega Corporation. Lipofectamine  
111 3000 was obtained from Thermo Fisher Scientific.

112 pRLTK plasmid was obtained from Promega. 3XERE TATA luc (luciferase reporter that  
113 contained three copies of vitellogenin Estrogen Response Element) was a kind gift from Donald  
114 McDonnell (Addgene plasmid # 11354; <http://n2t.net/addgene:11354>; RRID: Addgene\_11354).  
115 Plasmids expressing pcDNA3 (OHu23619C; pcDNA3.1+: RRID: Addgene\_10842), ER $\beta$   
116 (OHu25562C; pcDNA3.1+), c-Flag pcDNA3 (OHu23619D; pcDNA3.1+/C-(K) DYK), c-Flag  
117 ER $\alpha$  (OHu26586D; pcDNA3.1+/C-(K) DYK), and c-Flag ER $\beta$  (OHu25562D; pcDNA3.1+/C-  
118 (K) DYK) were obtained from GenScript.

119 Antibodies to ER $\alpha$  (D8H8; 8644), FOXO1 (D7C1H; cat# 14952, RRID:AB\_2722487), FOXO3a  
120 (75D8; cat# 2497), PARP (cat# 9542, RRID:AB\_2160739), cleaved PARP (Asp24, D64E10; cat#  
121 5625, RRID:AB\_10699459), caspase-3 (8G10; cat# 9665, RRID:AB\_2069872), cleaved caspase-

122 3 (D175; cat# 9664, RRID:AB\_2070042), caspase-7 (cat# 9492, RRID:AB\_2228313), cleaved  
123 caspase-7 (asp198, D6H1; cat# 8433, RRID:AB\_11178377), and GAPDH (D16H11; cat# 8884,  
124 RRID:AB\_11129865) were obtained from Cell Signaling Technology. Antibodies against ER $\beta$   
125 (clone 68-4; cat# 05-824) and M2 Flag (cat# F1804) were purchased from Sigma-Aldrich.  
126 The following primers were used for the corresponding mRNAs.

127 ESR2 full length: forward (5'-CTCCAGATCTTGTTCTGGACAGGGAT-3'), reverse (5'-  
128 GTTGAGCAGATGTTCCATGCCCTTGTTA-3'); ESR2 all isoforms: forward (5'-ACACA  
129 CCTTACCTGTAAACAGAGAG-3'), reverse (5'-GGGAGCCACACTTCACCATTCC-3');  
130 ESR1: forward (5'-CCGCCGGCATTCTACAGGCC-3'), reverse (5'-GAAGAAGGCCTTG  
131 CAGCCCT-3'); GAPDH: forward (5'-GTCGTATTGGGCGCCTGGTC-3'), reverse (5'-TT  
132 TGGAGGGATCTCGCTCCT-3').

133 <sup>1</sup>H-NMR spectra were recorded using a Bruker AV300NMR, AVIII400HD NMR spectrometer or  
134 a DRX400 NMR spectrometer at The Ohio State University College of Pharmacy. Chemical shifts  
135 ( $\delta$ ) are specified in ppm from chemical reference shifts for internal deuterated chloroform (CDCl<sub>3</sub>)  
136 set to 7.26 ppm. Coupling constants are defined in Hz. Mass spectra were obtained using an Advion  
137 Expression Model S Compact Mass Spectrometer equipped with an APCI source and TLC plate  
138 express or using a Thermo LTQ Orbitrap mass spectrometer. For carborane-containing  
139 compounds, the obtained mass resembling the most intense peak of the theoretical isotopic pattern  
140 was described. Measured patterns corresponded with calculated patterns. Unless otherwise noted,  
141 all reactions were carried out under argon atmosphere using commercially available reagents and  
142 solvents. Details of the procedure for the synthesis of MCSR-18-006 has been provided in  
143 Supplemental Data.

#### 144 ***Cell culture, cell viability and generation of resistance***

145 Normal mammary epithelial cells MCF10A (ATCC Cat# CRL-10317, RRID:CVCL\_0598), breast  
146 cancer cell lines, MCF7 (ATCC HTB-22), T47D (ATCC HTB-133; : NCI-DTP Cat# T-47D,  
147 RRID:CVCL\_0553), ZR-75-1 (ATCC CRL-1500), MDA-MB 231 (ATCC HTB-26,  
148 RRID:CVCL\_0062), MDA-MB 468 (ATCC HTB-132, RRID:CVCL\_0419) and HEK-293T  
149 (ATCC Cat# CRL-3216, RRID:CVCL\_0063 ) were obtained from ATCC. All the cells were  
150 grown according to supplier's recommendation in a humidified atmosphere containing 5% CO<sub>2</sub> at  
151 37°C. Cells were passaged and media changed every 2 days. Mycoplasma contamination of the  
152 cells were checked monthly using the MycoAlert Plus Mycoplasma Detection Kit (cat# LT07-703)  
153 (Lonza) following the manufacturer's protocol. For routine experiments, parental and drug  
154 resistant cells of MCF7 and T47D were cultured in phenol red-free basal medium (DMEM) media,  
155 containing charcoal-stripped fetal bovine serum along with other additives as recommended.

156 T47D cells were treated gradually at increasing concentrations with 4-hydroxy-tamoxifen (Tam),  
157 fulvestrant/Faslodex (Fas; estrogen receptor antagonist) or abemaciclib (cyclin dependent kinase  
158 4/6 inhibitor; CDK4/6i) to generate resistant cell lines (T47D-TamR, T47D-FasR and T47D-  
159 CDK4/6iR). Similarly, MCF7 cells were treated with increasing concentrations of abemaciclib to  
160 generate MCF7-CDK4/6iR cells. Control cells were treated with the vehicle DMSO. To evaluate  
161 the development of resistance, cells were examined for viability every 4 to 6 weeks with the  
162 CellTiter-Glo assay (Promega). Cell viability was measured in quadruplicates by seeding the cells  
163 (2,000 to 3,000 per well in 96-well plate), followed by addition of Tam, Fas, or abemaciclib at

164 different dilutions or DMSO (vehicle control) after 24 hours. Seventy-two hours later,  
165 luminescence was measured after addition of CellTiter-Glo reagent following the manufacturer's  
166 protocol. Cell viability was calculated as percentage relative to vehicle controls (100%). Viability  
167 curves were plotted using GraphPad Prism software (GraphPad Prism, RRID: SCR\_002798).  
168 Upon manifesting resistance, cells were maintained with continued drug exposure at  
169 concentrations to which they were resistant.

170 Immortalized mammary epithelial MCF10A cells as well as MCF7 and T47D breast cancer  
171 (parental and respective resistant) cells were plated (in quadruplicates) in 96-well plates (2000-  
172 3000 cells/well) and allowed to grow overnight followed by treatment with OSU-ERb-12,  
173 LY500307, DPN (Diarylpropionitrile), AC186, WAY200070 (WAY) at varying concentrations as  
174 indicated. The fresh medium and drugs were replaced every alternate day. Cell viability was  
175 assessed after 7 days of initial drug exposure using CellTiter-Glo Luminescent Cell Viability  
176 Assay and the viability curves were plotted as mentioned above.

### 177 ***Reverse Transcription Polymerase Chain Reaction (RT-PCR), western blot analysis, and*** 178 ***Estrogen Response Element Luciferase (ERE-LUC) reporter assays***

179 Total RNA was isolated from cells using TRIzol reagent (cat# 15596026) (Invitrogen, CA)  
180 following the manufacturer's instructions, treated with DNase 1 and reverse transcribed into cDNA  
181 using high capacity cDNA reverse transcription kit (Applied Biosystems, Foster City, CA). Real-  
182 time RT-PCR (qRT-PCR) was performed using 0.01-0.05 $\mu$ g cDNA with SYBR Green mastermix  
183 (Applied Biosystems) in an Applied Biosystems thermocycler. The fold difference in target gene  
184 mRNA levels normalized to GAPDH was calculated using the  $\Delta\Delta$ CT method. Semi-quantitative  
185 PCR was performed using the same set of primers as in qRT-PCR and visualized after  
186 electrophoretic separation to confirm the identity of the amplicons. The primers were designed  
187 spanning exon-exon junction to avoid non-specific amplification of genes.

188 Whole cell extracts were prepared in cell lysis buffer (50 mM Tris pH 8.1, 10 mM EDTA, 1%  
189 SDS, and 1% IGEPAL (CA-630, 18896; Sigma-Aldrich) followed by sonication and  
190 centrifugation at 14,000 rpm for 10 mins at 4°C. Protein concentrations in the extracts were  
191 measured using the bicinchoninic acid (BCA) method using BSA as the standard. Equivalent  
192 amounts of protein from whole cell lysates were mixed with 4 $\times$  Laemmli's buffer, boiled for 5  
193 minutes at 97°C, separated by SDS-polyacrylamide (10%) gel electrophoresis (Thermo Fisher  
194 Scientific), transferred to nitrocellulose membranes (GE Healthcare, Chicago, IL) and probed with  
195 the antibodies described above. Membranes were incubated overnight at 4°C with the primary  
196 antibody, washed and blotted for an hour with secondary anti-mouse/rabbit (HRP-conjugated)  
197 antibodies). Enhanced chemiluminescence substrate detection system (Millipore-Sigma) was  
198 applied to detect bound antibody complexes and visualized by autoradiography. The loading  
199 control was GAPDH. The intensity of the protein bands was quantified using image studio (Licor).  
200 HEK293T cells ( $7.5 \times 10^4$ /well) seeded in a 24-well plate were transfected for 12 hours with ERE-  
201 Luc, pRLTK (internal control, Promega), and c-Flag pcDNA3/ER $\alpha$ /ER $\beta$  plasmids using  
202 Lipofectamine 3000 (Thermo Fisher Scientific) following manufacturer's protocol. The media was  
203 changed with phenol-red free DMEM containing 10% charcoal-stripped FBS, and insulin  
204 (6ng/mL). Six hour later cells were treated with OSU-ERb-12, or LY500307 at varying  
205 concentrations as indicated. DMSO was used as a vehicle control. Luciferase activity was assessed  
206 after 72 hours of transfection using Dual-Luciferase Assay System (Promega).

207 ***Cell proliferation, cell cycle analysis, apoptosis, clonogenic survival, and cell migration assays***

208 MCF7 and T47D cells were plated at  $5 \times 10^5$  cells per plate in phenol red-free complete DMEM  
209 supplemented with charcoal-stripped FBS. The cells were treated for 72 hours with OSU-ERb-  
210 12 (0.5  $\mu\text{mol/L}$  and 10  $\mu\text{mol/L}$ ) or LY500307 (MCF7: 0.5  $\mu\text{mol/L}$  and 3  $\mu\text{mol/L}$ ; T47D: 0.5  $\mu\text{mol/L}$   
211 and 7  $\mu\text{mol/L}$ ). Differing concentrations were used to avoid complete loss of viability. DMSO and  
212 fulvestrant (0.5  $\mu\text{mol/L}$ ) were used as negative and positive controls, respectively. The cells were  
213 harvested and stained as per the protocol for the Click-iT Edu Alexa Fluor 647 kit (Invitrogen;  
214 cat# C10424). The stained cells were analyzed via flow cytometry (BD FACSCalibur Flow  
215 Cytometer).

216 MCF7 and T47D cells were plated in 100 mm dishes ( $5 \times 10^5$  cells) in phenol red-free complete  
217 DMEM supplemented with charcoal-stripped FBS. The cells were treated for 72h hours with OSU-  
218 ERb-12 or LY500307 at the indicated concentrations. DMSO was used as vehicle control. The  
219 cells were harvested, fixed in 70% ethanol and stained with propidium iodide. The stained cells  
220 were analyzed via flow cytometry on a BD FACSCalibur Flow Cytometer.

221 Breast cancer MCF-7 and T47D cells were plated and treated 24h later with OSU-ERb-12 (0.5  
222  $\mu\text{mol/L}$  and 10  $\mu\text{mol/L}$ ) or LY500307 (MCF7: 0.5  $\mu\text{mol/L}$  and 3  $\mu\text{mol/L}$ ; T47D: 0.5  $\mu\text{mol/L}$  and  
223 7  $\mu\text{mol/L}$ ) for 48 hours. Cells were collected and processed according to the manufacturer (TUNEL  
224 Assay Kit - BrdU-Red (cat# ab66110) (Abcam). Processed breast cancer cells were analyzed on  
225 BD FACSCalibur Flow Cytometer.

226 MCF7 and T47D cells were plated in 6-well plates ( $1 \sim 2 \times 10^4$  cells/well). Twenty four hours after  
227 plating, cells were treated with OSU-ERb-12, LY500307, or vehicle (DMSO) for 7-10 days. The  
228 fresh medium and drugs were replaced every other day. Next, cell colonies were washed with PBS,  
229 fixed with paraformaldehyde (4%), and stained with crystal violet solution (0.05%). Colonies  
230 were then washed with water and air-dried. Visible colonies were counted manually.

231 MCF7 Cells were seeded, treated with DMSO (control), OSU-ERb-12 or LY500307 and allowed  
232 to grow until confluence. Confluent monolayers were scratched using a sterile pipette tip, washed  
233 and incubated in complete medium containing DMSO or the drugs. Plates with similar scratch  
234 were selected by examination under microscope and used for further analysis. Images were  
235 captured immediately after scratch (0 hour) and 24 hours post-scratch. Migration of cells from the  
236 edge of the groove toward the center was monitored at 24 hours (40 magnification). To calculate  
237 the fraction of the gap covered by the cells in a 24-hour period the width of the scratch was  
238 measured at 0 hour and at 24 hours. Mean fraction of filled area was determined and data presented  
239 was normalized to the control cells.

240 ***Messenger RNA expression of patient samples and Statistical and bioinformatics analyses***

241 Patients treated at The Ohio State University Comprehensive Cancer Center – Arthur G. James  
242 Cancer Hospital and Richard J. Solove Research Institute since 1998 with a diagnosis of metastatic  
243 ER $\alpha$ + and HER2 negative (ER $\alpha$ + / HER2 $^-$ ) breast cancer and confirmed RNA sequencing analysis  
244 were eligible for this retrospective clinical correlation. Following IRB approval (OSU  
245 1999C0245), the list of patients fulfilling the previous criteria was obtained from the Ohio State  
246 University Medical Center and James Cancer Registry. 118 medical record were reviewed and 37

247 patients had RNA sequencing performed through the Oncology Research Information Exchange  
248 Network (ORIEN) and were deemed eligible.

249 Data for the 37 eligible patients were initially queried and obtained from The Ohio State University  
250 Information Warehouse and from ORIEN-AVATAR and uploaded into REDCap (REDCap,  
251 RRID:SCR\_003445). Data missing from the initial query were populated using manual review of  
252 each patient's electronic medical record.

253 The objective was to determine the mRNA expression levels of the genes which are targets of ER-  
254 AP1 mediated transcription and AP1 independent ER mediated transcription including CCND1,  
255 MYC, IGF-1, Bcl-2, MMP-1, FN1; IGFBP-4, E2F4, CXCL12, PGR, EBAG9, and TRIM25 and  
256 correlated with ER $\alpha$  and ER $\beta$ .

257 Viability, proliferation, apoptosis, and cellular mRNA expression were analyzed using students t-  
258 test.

259 For each dose, linear mixed models were fit for log-transformed viability with fixed effects for  
260 regimen (4-hydroxy-tamoxifen, OSU-ERb-12 and 4-hydroxy-tamoxifen+OSU-ERb-12) and  
261 random effects accounting for within-batch correlation of replicates. Predictions and standard  
262 errors for viability of the 4-hydroxy-tamoxifen+OSU-ERb-12 combination under a hypothesized  
263 Bliss independence model were computed from estimated mean viabilities under 4-hydroxy-  
264 tamoxifen and OSU-ERb-12 alone via the formula  $\text{Log\_Viability (Bliss)} = \text{Log\_Viability(4-}$   
265  $\text{hydroxy-tamoxifen)} + \text{Log\_Viability (OSU-ERb-12)}$ . Interaction at each dose was quantified as  
266 the ratio of the predicted viability under the Bliss independence model over the estimated viability  
267 under the tested 4-hydroxy-tamoxifen + OSU-ERb-12 combination, with ratios >1 indicating  
268 synergy.

269 Total RNA was sequenced with minimum 20 million reads and >65% reads aligned identified for  
270 subsequent processing to transcript abundance values (FKPM; fragments per kilobase per million  
271 reads) following ORIEN standard pipeline: STAR aligner (STAR, RRID:SCR\_004463), Star-  
272 fusion, and RSEM (RSEM, RRID:SCR\_013027) with genome GRCh38 alignment/annotation.  
273 Statistical analysis was performed using the R statistical software, including the 'survival'  
274 package. Summary statistics were computed for demographic variables and expression levels  
275 (FPKM), and Spearman correlation coefficients were computed for *ESR1* (ER $\alpha$ ) and *ESR2* (ER $\beta$ )  
276 versus other expression levels. Cox regression was used to calculate the association between  
277 overall survival and  $\log_2(1 + \text{FPKM})$  for ER $\alpha$  and ER $\beta$  expression levels.

## 278 **Results**

### 279 *Selection for drug-resistant MCF7 and T47D cell lines*

280 We cultured MCF7 and T47D cell lines, in the presence of DMSO (control), 4-hydroxy-tamoxifen,  
281 fulvestrant, or the CDK4/6i abemaciclib at gradually increasing concentrations to select for  
282 acquired resistance. With extended exposure, both the cell lines demonstrated decreased sensitivity  
283 to the drugs compared with the corresponding parental controls (**Supplemental Fig. S1**). Chemical  
284 Structures of the drugs/inhibitors used in this study have been provided in **Supplemental Fig. S2**.

285 Lack of activation of ERE-luciferase reporter vector by overexpressed ER $\alpha$  and ER $\beta$  proteins in  
286 293T cells treated with the inactive chemical analog of OSU-ERb-12, MCSR-18-006, is shown in  
287 **Supplemental Fig. S3**. The lack of binding affinity of MCSR-18-006 for ER $\alpha$  and ER $\beta$  proteins  
288 as measured by radiolabeled estradiol competition binding assays is shown in **Supplemental Fig.**  
289 **S4**.

290 ***ESR2 and ESR1 genes and their protein products are differentially expressed in ER $\alpha$ +  
291 parental and resistant as well as triple-negative breast cancer cell lines, and ER $\beta$  driven  
292 ERE-luciferase promoter activity is significantly enhanced upon treatment with selective ER $\beta$   
293 agonists compared to that of ER $\alpha$***

294 We assessed the basal expression levels of *ESR2* and *ESR1* in three ER-positive breast cancer cell  
295 lines (MCF7, T47D and ZR-75-1), the derivative endocrine-resistant and CDK4/6i resistant lines  
296 (of MCF7 and T47D) and compared with those of immortalized mammary epithelial cells  
297 (MCF10A) (**Fig.1**) using primers that selectively amplified only the full-length, canonical *ESR2*,  
298 or that amplified all known splice variants of *ESR2* (**Supplemental Fig. S5A**), as well as primers  
299 that specifically amplify full-length *ESR1*. The p-values and 95% confidence interval (CI) of  
300 corresponding expression data are shown in **Supplemental Table 1**. qRT-PCR data demonstrated  
301 a comparable expression of full-length *ESR2* in MCF7 and MCF10A lines (**Fig. 1A, Supplemental**  
302 **Table 1**). While MCF7-FasR and MCF7-CDK6-O/E cells displayed no significant increase in full  
303 length *ESR2* expression relative to the control MCF10A cells, MCF7-TamR, and MCF7-  
304 CDK4/6iR cells showed 3.6-fold (p=0.0035) and 6-fold (p=0.0001) higher expression levels (**Fig.**  
305 **1A, Supplemental Table 1**). On the other hand, T47D exhibited a 4.8-fold (p=0.0265) higher  
306 expression of *ESR2* compared to MCF10A cells. Significantly higher expression of full-length  
307 *ESR2* in T47D-TamR (5.1-fold, p=0.0009) and T47D-CDK4/6iR (5.1-fold, p=0.0075) compared  
308 to MCF10A was noted (**Fig. 1A, Supplemental Table 1**). ZR-75-1 cells displayed the highest  
309 level of full-length *ESR2* RNA expression (~19-fold higher than MCF10A; p< 0.01) (**Fig. 1A,**  
310 **Supplemental Table 1**). Both the TNBC lines had significantly higher expression of full-length  
311 *ESR2* compared with MCF10A (MDA-MB-231: 4.4-fold, p<0.05; MDA-MB-468: 5.2-fold,  
312 p<0.01) and these levels were comparable to those in the ER $\alpha$ + MCF7 and T47D breast cancer  
313 cell lines.

314 When we measured expression levels using primers that amplified all the splice isoforms of *ESR2*,  
315 the expression levels were significantly higher than MCF10A in most of the cells tested except  
316 MCF7, MCF7-FasR, and the TNBC line MDA-MB-468 (**Fig. 1A, Supplemental Table 1**). About  
317 5,000 (p<0.05) and 12,000-fold (p<0.05) increased *ESR1* expression was noted in MCF7 and  
318 T47D cells, respectively, compared to MCF10A (**Fig. 1B, Supplemental Table 1**).

319 To check the specificity of the primers to amplify the correct PCR products we performed agarose  
320 gel electrophoresis with the samples of qRT-PCR. Our data showed a single band (**Supplemental**  
321 **Fig. S5B**) with correct PCR products that were confirmed by sequencing.

322 Next, we performed western blot analyses to evaluate the expression of full-length ER $\beta$  and ER $\alpha$   
323 proteins with the cell lysates (**Fig. 1C**). We tested antibodies raised against ER $\beta$  from several  
324 different sources including Developmental Studies Hybridoma Bank (CWK-F12), Invitrogen  
325 (PPZ0506), and Sigma (clone 68-4). Of these tested antibodies while CWK-F12 and PPZ0506  
326 were specific but only sensitive to the overexpressed (positive control) ER $\beta$  protein, the antibody  
327 from Sigma was specific as well as sensitive to ER $\beta$  protein expressed at endogenous levels. As



328 shown in **Fig. 1C (upper panel)**, all the parental and resistant ER $\alpha$ + cell lines, TNBC lines as well  
329 as immortalized mammary epithelial cells expressed full-length ER $\beta$ . As expected, our data  
330 demonstrated that all the ER $\alpha$ + parental cell lines but none of the TNBC cell lines expressed ER $\alpha$   
331 protein. MCF7-TamR cells expressed more ER $\alpha$  protein than the parental MCF7 cells while  
332 MCF7-FasR had no detectable ER $\alpha$  expression. Similarly, T47D-FasR and T47D-CDK4/6iR cells  
333 had lower expression of ER $\alpha$  than the parental T47D cells.

334 In summary, full-length ER $\beta$  mRNA and protein is expressed in ER $\alpha$ + breast cancer cell lines at  
335 levels that are comparable to expression levels in TNBC cell lines, and its expression is preserved  
336 in all the resistant derivative cell lines.

337 To determine the specificity of ER $\beta$  agonists, we treated HEK293T cells with OSU-ERb-12 or  
338 LY500307 (known selective ER $\beta$  agonist) at increasing concentrations following co-transfection  
339 with plasmids 3XERE TATA luc, pRLTK, FLAG-ER $\alpha$  or FLAG-ER $\beta$  (please see Materials and  
340 Methods section for details), and measured luciferase reporter activity (**Fig. 1D**). The expression  
341 of FLAG-ER $\alpha$  and FLAG-ER $\beta$  proteins was similar as measured by immunoblot for FLAG  
342 performed on lysates from the vehicle-treated 293T cells transfected with the corresponding  
343 expression plasmids (**Fig. 1D, right panel**). Comparison of the induction of luciferase activity  
344 demonstrated that ER $\alpha$  exhibited full activity in presence of 30 nmol/L OSU-ERb-12 and 10  
345 nmol/L LY500307 treatment. Our data showed that luciferase activation by OSU-ERb-12 was  
346 significantly increased in the ER $\beta$  expressing cells as compared to those that expressed ER $\alpha$ . For  
347 example, at 30 nmol/L of OSU-ERb-12 there was ~4-fold (p<0.05) and ~40-fold (p<0.05) increase  
348 in luciferase activity, respectively, compared to their corresponding vehicle-treated cells (**Fig. 1D,**  
349 **left panel**). There was 10-fold (p=0.0059) higher ERE-LUC activity in ER $\beta$  overexpressing cells  
350 compared to that of ER $\alpha$  by OSU-ERb-12 at 30 nmol/L (**Supplemental Table 2**). Similarly, for  
351 LY500307 at 10 nmol/L there was 2.1-fold (maximum induction; p<0.05) activation by ER $\alpha$  and  
352 84-fold (p<0.05) activation by ER $\beta$  compared to the corresponding vehicle-treated samples (**Fig.**  
353 **1D, central panel, Supplemental Table 2**). At this concentration of LY500307, ER $\beta$   
354 demonstrated 40-fold higher activity (p=0.0038) compared to ER $\alpha$ .

355 ***Cell viability assay data demonstrates significant cytotoxicity of the selective ER $\beta$***   
356 ***agonists and those synergize with ER $\alpha$  agonists to demonstrate cytotoxicity towards ER $\alpha$ +***  
357 ***breast cancer cell lines***

358 Next, we assessed the viability of parental, endocrine resistant, CDK4/6i-R MCF7 and T47D, and  
359 MCF7-CDK6 O/E cell lines following treatment with ER $\beta$  agonists OSU-ERb-12 and LY500307  
360 (**Fig. 2, Supplemental Table 3**). We assessed Cell viability after 7 days of initial drug exposure  
361 using CellTiter-Glo Luminescent Cell Viability Assay. This duration is consistent with that used  
362 for toxicity assays with other endocrine agents such as fulvestrant (18, 19). We compared the  
363 viability of the drug treated transformed cell lines to that of MCF10A cells. The IC<sub>50</sub> values for  
364 T47D cells (OSU-ERb-12: 10.43  $\mu$ mol/L-**Fig. 2C**; LY500307: 7.29  $\mu$ mol/L- **Fig. 2D**), tamoxifen  
365 and fulvestrant resistant MCF7 cells, tamoxifen and fulvestrant resistant T47D cells, CDK6  
366 overexpressing MCF7 cells, abemaciclib resistant MCF7 cells and abemaciclib resistant T47D  
367 cells were significantly lower than that of MCF10A cells (OSU-ERb-12: 13.96  $\mu$ mol/L ;  
368 LY500307: 30.53  $\mu$ mol/L; **Fig. 2, Supplemental Table 3**). Compared to the parental MCF7 cell  
369 line, all the resistant lines except MCF7-CDK6 O/E had significantly lower IC<sub>50</sub> values for OSU-

370 ERb-12 (**Fig. 2A**). Similarly, all three resistant T47D lines displayed significantly higher  
371 sensitivity towards OSU-ERb-12 compared to their parental counterpart (**Fig.2C, Supplemental**  
372 **Table 3**).

373 Despite a high degree of selectivity, we saw some activation of ER $\alpha$  by both ER $\beta$  agonists in our  
374 reporter assay (**Fig. 1D**). We also observed an increase in viability of ER $\alpha$ + breast cancer cell  
375 lines when exposed to low concentrations of both ER $\beta$  agonists. We hypothesized that combining  
376 ER $\beta$  agonists with an ER $\alpha$  antagonist would increase their activity and eliminate their stimulatory  
377 effects at low concentrations. We tested several ER $\alpha$  antagonists, namely, 4-hydroxy-tamoxifen  
378 (selective estrogen receptor modulator), fulvestrant, elacestrant (both selective estrogen receptor  
379 degraders/SERDs), and MPP (selective ER $\alpha$  antagonist) at concentrations that fully block ER $\alpha$  in  
380 combination with OSU-ERb-12. As shown in **Fig. 3A & 3B**, in T47D cells, all these ER $\alpha$   
381 antagonists caused a significant reduction in the IC<sub>50</sub> of OSU-ERb-12 and eliminated its  
382 stimulatory effects at low concentrations. Of the tested drugs, 4-hydroxy-tamoxifen, when used at  
383 a concentration of 0.5  $\mu$ mol/L, displayed the highest efficacy leading to the reduction of IC<sub>50</sub> for  
384 OSU-ERb-12 to 1  $\mu$ mol/L from 14.10  $\mu$ mol/L (**Fig. 3A, Supplemental Table 4**). We further  
385 analyzed the validity of the combination treatment of OSU-ERb-12 and 4-hydroxy-tamoxifen  
386 using the Bliss independence model (please see Materials and Methods for details). Our data  
387 demonstrated a significant dose-response with synergy (**Fig. 3C, Supplemental Table 4**). There  
388 was evidence of synergy (the ratio being 1 or above) at all doses for the combination of OSU-ERb-  
389 12+Tam. There was no evidence of antagonism at any dose.

390 We next determined whether OSU-ERb-12 effects are specifically mediated by the ER $\beta$  receptor  
391 by comparing the OSU-ERb-12 induced decreases in cell viability to that of an inactive chemical  
392 analog MCSR-18-006 that differs at two atoms from OSU-ERb-12 (**Supplemental Fig. S2**). As  
393 shown in **Fig. 3D**, in T47D cells, OSU-ERb-12 demonstrated an IC<sub>50</sub> value of 10.41  $\mu$ mol/L that  
394 was 3.24-fold lower than for MCSR-18-006 (p<0.01). However, in the presence of 4-hydroxy-  
395 tamoxifen (0.5  $\mu$ mol/L) the IC<sub>50</sub> of OSU-ERb-12 was 1.02  $\mu$ mol/L, which was 38.5-fold lower  
396 than that of MCSR-18-006 combined with 4-hydroxy-tamoxifen (**Fig. 3D, right figure;**  
397 **Supplemental Table 5 and 6**).

398 We then tested the viability of both MCF7 and T47D cell lines upon treatment with three other  
399 less selective ER $\beta$  agonists namely, DPN (diarylpropionitrile) (15), AC186 (20) , and  
400 WAY200070 (21). Our data demonstrated that none of these ER $\beta$  agonists (**Supplemental Fig.**  
401 **S6**) exerted any significant cytotoxic effect on any of the ER $\alpha$ + cell lines.

#### 402 *Selective ER $\beta$ agonists exert anti-proliferative and apoptotic effects on ER $\alpha$ + breast cancer* 403 *cell lines and results in induction of FOXO 1/3 proteins in ER $\alpha$ + breast cancer cell lines*

404 Since both the ER $\beta$  agonists reduced the viability of ER $\alpha$ + cell lines we further examined the  
405 mechanism of reduced viability. Both OSU-ERb-12 and LY500307 reduced cell proliferation,  
406 induced S phase arrest and increased apoptosis of MCF7 and T47D cells (**Fig. 4**).

407 Cell proliferation was reduced by OSU-ERb-12 (10  $\mu$ mol/L) and LY500307 (3  $\mu$ mol/L) in MCF7  
408 cells by 19% (p=0.016) and 27% (p=0.0028), respectively (**Fig.4A, Supplemental Fig. S7,**  
409 **Supplemental Table 7**). Similarly, in T47D cells OSU-ERb-12 (10  $\mu$ mol/L) and LY500307 (7  
410  $\mu$ mol/L) reduced proliferation by 31% (p 0.0074) and 15% (p=0.015), respectively (**Fig.4A,**  
411 **Supplemental Fig. S7, Supplemental Table 7**). However, the observation that the ER $\beta$  agonists

412 either significantly increased or did not decrease proliferation at the lower concentration (0.5  
413  $\mu\text{mol/L}$ ) in both the cell lines, explains the increased cell viability observed at lower doses in  
414 earlier experiments (**Fig.2**).

415 Cell cycle analysis demonstrated that OSU-ERb-12 treatment (0.5  $\mu\text{mol/L}$ ) reduced the G0/G1  
416 phase (8.7% decrease  $p=0.02$ ) and increased S-phase fraction (6.4% increase,  $p=0.0347$ ) of MCF7  
417 as well as in T47D cells (G0/G1: 6.6% decrease,  $p=0.0036$ ; S-phase: 5.2% increase,  $p=0.0015$ )  
418 (**Fig. 4B, Supplemental Fig. S8, Supplemental Table 8**). Similarly, LY500307 at 0.5  $\mu\text{mol/L}$   
419 caused a significant reduction in G0/G1 phase (13% decrease,  $p=0.019$ ) and increase in S-phase  
420 (7.1% increase,  $p=0.049$ ) of MCF7 as well as T47D cells (G0/G1: 7.7% decrease,  $p=0.0018$ ; S-  
421 phase: 6.2% increase,  $p=0.0004$ ) (**Fig. 4B, Supplemental Fig. S8, Supplemental Table 8**).  
422 However, at a higher dose (around IC<sub>50</sub>) OSU-ERb-12 demonstrated no significant decrease in  
423 G0/G1 phase nor arrest at S -phase in both the cell lines-an observation that needs further  
424 explanation. Nevertheless, in T47D cells, LY500307 at higher dose (7  $\mu\text{mol/L}$ ) exhibited a  
425 dramatic decrease (34%,  $p=0.0079$ ) of G0/G1 phase, increase in apoptotic cells (at SubG0, 5.6%,  
426  $p=0.0068$ ), arrest at S (12.8% increase,  $p=0.006$ ), and G2/M (7.6% increase,  $p=0.0135$ ) phases,  
427 respectively. Altogether, this data suggests that treatment with ER $\beta$  agonists causes cell cycle  
428 arrest in S and/or G2/M phases.

429 We observed a significant increase in apoptosis of LY500307-treated (7 $\mu\text{mol/L}$ ) MCF-7 cells  
430 (7.7% apoptotic cells,  $p=0.01$ ) compared to the vehicle-treated control (4.2% apoptotic cells). We  
431 did not observe a statistically significant increase in apoptosis in MCF7 cells treated with OSU-  
432 ERb-12. We noticed a significant increase in apoptosis of T47D cells treated with 10  $\mu\text{mol/L}$  OSU-  
433 ERb-12 (13%,  $p=0.03$ ), 0.5  $\mu\text{mol/L}$  LY500307 (10.1%,  $p=0.003$ ) and 7  $\mu\text{mol/L}$  LY500307  
434 (11.1%,  $p=0.0005$ ) apoptotic cells, respectively as compared to the vehicle treated control (3.2%)  
435 (**Fig. 4C, Supplemental Fig. S9, Supplemental Table 9**).

436 Next, we tested the efficacy of OSU-ERb-12 and LY500307 in reducing colony formation of  
437 MCF7 and T47D cells. Colony-forming ability was significantly reduced upon treatment with both  
438 the agonists (**Fig. 5A, Supplemental Table 10**). In comparison with vehicle-treated cells OSU-  
439 ERb-12 suppressed colony formation in MCF7 cells by 14% ( $p=0.05$ ) and 44% ( $p=0.002$ ) and  
440 LY500307 by 79% ( $p=0.003$ ), and 100% ( $p=0.0007$ ) at 3  $\mu\text{mol/L}$  and 5  $\mu\text{mol/L}$ , respectively.  
441 Similarly, the reduction in colony formation in T47D with OSU-ERb-12 was 64.5% (5  $\mu\text{mol/L}$ ;  
442  $p=0.011$ ). With LY500307 colony formation was reduced by 19.9% (3  $\mu\text{mol/L}$ ;  $p=0.015$ ) and 95%  
443 (5  $\mu\text{mol/L}$ ;  $p=0.005$ ). However, there was no significant reduction of colony formation in T47D  
444 treated with 3  $\mu\text{mol/L}$  OSU-ERb-12 (**Fig. 5A, Supplemental Table 10**).

445 We then performed a cell motility assay to investigate whether OSU-ERb-12 and LY500307  
446 treatment could lead to the reduction of migratory properties of breast cancer cells. As shown  
447 in **Fig. 5B**, there was a significant decrease in the cell motility in the MCF7 cell line in the presence  
448 of both the agonists. Treatment with OSU-ERb-12 inhibited MCF7 cell migration by 34.7 % (5  
449  $\mu\text{mol/L}$ ;  $p=0.0004$ ) and 42.9% (10  $\mu\text{mol/L}$ ;  $p=0.0026$ ) and LY500307 by 70.2 % (5  $\mu\text{mol/L}$ ;  
450  $p<0.0001$ ) and 91.9% (10  $\mu\text{mol/L}$ ;  $p<0.0001$ ) (**Fig. 5B, Supplemental Table 11**).

451 To elucidate the underlying mechanism of ER $\beta$  agonists-mediated cell death, we measured the  
452 levels of activated executioner caspases by Western blot analysis. As MCF7 cells do not express  
453 caspase 3 (22), we measured caspase 7 levels in this cell line. Robust activation of the effector

454 caspases 7 (MCF7) or 3 (T47D) resulted within 12 hours of treatment of cells with both the  
455 agonists. The effect persisted at least up to 48 hours (**Fig. 5C**). In contrast, in vehicle-treated cells  
456 increased caspase cleavage was not detected. A similar increase in the proteolysis of their substrate  
457 PARP-1 was noted in ER $\beta$  agonist-treated cells (**Fig. 5C**).

458 It has been demonstrated that ER $\beta$  suppresses tumor growth and induces apoptosis by augmenting  
459 the transcription of the tumor suppressor genes *FOXO1* and *FOXO3* in prostate cancer (23).  
460 Therefore, we determined their expression levels in ER $\beta$  agonist-treated breast cancer cells. As  
461 shown in **Fig. 5D**, both FOXO1 and FOXO3a protein levels were increased in OSU-ERb-12- and  
462 LY500307- treated MCF7 and T47D cell lines.

### 463 *ER $\beta$ expression in human breast cancer samples*

464 Previous studies suggested that distinct from ER $\alpha$ , ER $\beta$  inhibits transcription from promoters that  
465 incorporate estrogen response-tetradecanoyl phorbol ester (ERE-AP1) composite response  
466 elements (13). We hypothesized that the ER $\beta$ /*ESR2* mRNA expression levels in ER $\alpha$ + human  
467 breast cancer samples would negatively correlate with those of genes with promoters that contain  
468 ERE-AP1 response elements and that there would be a positive association between *ESR2* mRNA  
469 expression levels and overall survival.

470 Thirty-seven patients with metastatic ER $\alpha$ +HER2- breast cancer were included in this study.  
471 Demographic and clinical characteristics are displayed in **Supplemental Table 12**. All the patients  
472 in this cohort were female with a median age of 56 years (range 27-78). The patients were  
473 predominantly Caucasian (35, 95%) and most women were postmenopausal (23, 66%).

474 We found that the expression of the cyclin D1 gene, the classic target of estrogen-stimulated  
475 transcription through an AP1 response element, negatively correlated with that of ER $\beta$ /*ESR2* as  
476 measured using Spearman correlation coefficient ( $\rho = -0.45$ ,  $p = 0.005$ ) (**Figure 6B**). ER $\beta$ /*ESR2*  
477 expression was also negatively correlated with that of ER $\alpha$ /*ESR1* ( $\rho = -0.35$ ,  $p = 0.033$ ).  
478 However, ER $\beta$ /*ESR2* mRNA expression positively correlated with that of *IGFBP4* ( $\rho = 0.58$ ,  $p$   
479  $< 0.001$ ) and *CXCL12* ( $\rho = 0.54$ ,  $p < 0.001$ ) (**Fig. 6B**). The univariate Cox proportional hazards  
480 estimate for overall survival by *ESR2* expression was 0.54 (95% CI 0.06, 5.22), suggesting a  
481 positive trend that did not reach statistical significance in this numerically limited cohort (**Fig. 6A**).

### 482 **Discussion**

483 ER $\alpha$  subtype constitutes 70% of all breast cancers while annually about 600,000 breast cancer-  
484 related death occurs worldwide (1). Although metastatic ER $\alpha$ + breast cancer is initially treated  
485 with estrogen deprivation or ER $\alpha$  blockade, endocrine resistance eventually entails a change in  
486 therapy. The response to second-line endocrine agents such as fulvestrant is generally short. The  
487 advent of CDK4/6 inhibitors such as palbociclib (24, 25), ribociclib (26), and abemaciclib (27, 28)  
488 has doubled progression-free survival when used in combination with endocrine agents. However,  
489 resistance to CDK4/6 inhibitors is an increasing clinical challenge (29). Also, the duration of  
490 response to second-line endocrine therapies is generally short. After the exhaustion of endocrine  
491 treatment, chemotherapy remains the only treatment option. Therefore, there is an urgent need for  
492 tolerable therapies to prolong overall survival with better quality of life for advanced ER $\alpha$ + breast  
493 cancer patients.

494 Accumulating evidence suggest while ER $\alpha$  is oncogenic, ER $\beta$  plays a tumor suppressor role in  
495 different cancers including breast cancer (30, 31). The efficacy of selective ER $\beta$  agonists such as  
496 LY500307 has been previously described in preclinical models of TNBC (32), melanoma (32),  
497 glioblastoma multiforme (33), and prostate cancer (34). However, there has been limited study of  
498 the role of ER $\beta$  in estrogen receptor  $\alpha$  positive breast cancer. One reason is that for this particular  
499 indication a high degree of selectivity for ER $\beta$  over ER $\alpha$  would be required. Our institution  
500 recently developed a highly selective ER $\beta$  agonist: OSU-ERb-12 (16). We confirmed the  
501 selectivity of this compound using ERE-luciferase promoter assays showing ~40-fold induction  
502 upon treatment of ER $\beta$  overexpressing cells.

503 Although previous preclinical studies have mostly focused on TNBC, we observed that ER $\beta$  was  
504 expressed (both RNA and protein level) in ER $\alpha$ + breast cancer cell lines at levels that were not  
505 significantly different from those in TNBC cell lines (**Fig. 1, A-C**). Endocrine and CDK4/6  
506 resistant derivatives of these ER $\alpha$ + cell lines had comparable or higher expression compared to  
507 the parental cell lines. These observations, therefore, are in line with the potential for efficacy in  
508 ER $\alpha$ + breast cancer.

509 We showed that OSU-ERb-12, like the control compound LY500307, exerted significant  
510 cytotoxicity towards MCF7 and T47D ER $\alpha$ + breast cancer cell lines with IC50 values were lower  
511 compared to immortalized mammary epithelial cells (MCF10A). Furthermore, OSU-ERb-12  
512 exhibited cytotoxicity towards the corresponding endocrine- and CDK4/6 inhibitor-resistant  
513 derivative lines of MCF7 and T47D with either similar or even significantly lower IC50 values,  
514 demonstrating its therapeutic efficacy towards both treatment naïve and resistant ER $\alpha$ + breast  
515 cancer cells. Furthermore, we demonstrated that these effects are ER $\beta$  specific using a close  
516 structural analog that lacks the ER $\beta$  agonist activity and was many-fold less cytotoxic than the  
517 active compound.

518 At lower concentrations of OSU-ERb-12 and LY500307, there was an increase in cell viability.  
519 We hypothesized that this may be due to ER $\alpha$  activation, given the large molar excess of ER $\alpha$   
520 receptors over ER $\beta$  receptors in ER $\alpha$ + breast cancer cell lines. This prompted us to investigate the  
521 cytotoxic efficacy of OSU-ERb-12 in combination with clinically available potent ER $\alpha$   
522 antagonists. In the combination studies, tamoxifen showed maximum inhibitory effect with a 14-  
523 fold reduction of IC50 value compared with OSU-ERb-12 alone. Using the Bliss Independence  
524 model, we found synergistic interaction between tamoxifen and OSU-ERb-12 at all the doses used  
525 in the study.

526 Of note, the cellular 50% inhibitory concentration were many-fold higher than the cellular 50%  
527 effective concentration for activation of a canonical palindromic ERE response element. There are  
528 many potential explanations for this. Firstly, inhibition of viability may only be achieved when the  
529 majority of available receptor is activated by ligand, for example possibly at the EC90-100  
530 concentration range. Secondly, the EC50 concentration represents transcriptional activation at a  
531 palindromic estrogen response element with optimal configuration and spacing of the half binding  
532 sites. Depending on the configuration of the EREs in promoters, the EC50 may be higher. Of note,  
533 ligand-ER-DNA interactions, including the stoichiometry and affinity of the ligand for the ligand-  
534 binding domain are dependent on the spacing and orientation of ERE binding sites as well as  
535 flanking sequences (35-37). Thirdly, cytotoxicity may not be dependent on transcription but on  
536 ligand-induced protein-protein interactions that may also modulate ligand binding (38).

537 Our study demonstrated the efficacy of ER $\beta$  agonists in attenuating cell proliferation, cell  
538 migration and colony formation as well as inducing cell cycle arrest and apoptosis of ER $\alpha$ + breast  
539 cancer cell lines. Also, we showed that ER $\beta$  agonist treated MCF7 and T47D cells exhibited  
540 activation of effector caspases 7/3 and cleavage of PARP as well, which are markers of apoptosis.  
541 FOXO proteins act as tumor suppressors in a variety of cancers including breast cancer (39, 40).  
542 Previous studies have shown that ER $\beta$  upregulates the expression of FOXO transcription factors  
543 in preclinical models of prostate cancer (23, 41, 42). Our data demonstrated significantly higher  
544 expression of both FOXO1 and FOXO3a proteins in ER $\beta$  agonist-treated cells. Thus, induction of  
545 FOXO proteins may be one of the mechanism(s) by which OSU-ER-12 exhibits its tumor-  
546 suppressor activity. Further confirmation of the necessity of FOXO transcription factor  
547 upregulation for the efficacy of ER $\beta$  agonists will be required.

548 Given the tumor suppressor activity of ER $\beta$ , we hypothesized that its expression would be  
549 positively associated with the overall survival of metastatic breast cancer patients. In the present  
550 study, we showed that in a cohort of 37 metastatic breast cancer patients there was a trend of  
551 increased overall survival in *ESR2*-high expressing patients compared to *ESR2*-low expressing  
552 patients. However, this data is not statistically significant in this small cohort of patients. Further  
553 analysis in a larger cohort is warranted. Previous studies had suggested that ER $\beta$  might antagonize  
554 the transcriptional upregulation of genes that incorporate composite estrogen-phorbol ester  
555 response elements such as *CCND1* (43-45). In our cohort of patients, we found that the expression  
556 of *CCND1* mRNA, a typical estrogen-stimulated target gene, is negatively correlated with the  
557 expression of *ESR2* mRNA.

558 In conclusion, we have provided sufficient evidence that OSU-ERb-12 could be a potential  
559 candidate compound for its tumor suppressor activity towards ER $\alpha$ + breast cancer. Understanding  
560 the details of its mechanism of action and further confirmation of its efficacy is warranted using  
561 *in vivo* model systems.  
562

## 563 **Figure Legends**

564 **Figure 1: A-C, *ESR1* and *ESR2* genes are differentially expressed in ER $\alpha$ + parental,**  
565 **respective endocrine resistant, and triple negative breast cancer cell lines. A and B,**  
566 **Expression of *ESR1* and *ESR2* in immortalized mammary MCF10A, transformed ER $\alpha$ + MCF7**  
567 **and T47D, endocrine resistant MCF7-TamR, MCF7-FasR, T47D-TamR, and T47D-FasR, CDK6**  
568 **over-expressing MCF7 (MCF7-CDK6 O/E), CDK4/6 inhibitor resistant MCF7 (MCF7-**  
569 **CDK4/6iR) and T47D (T47D-CDK4/6iR), ZR-75-1, and triple negative breast cancer (TNBC;**  
570 **MDA-MB231, MDA-MB-468, Hs578t) cell lines. Total RNA was isolated from the established**  
571 **cell lines using TRIzol. The expression of each gene was assessed by quantitative RT-PCR (qRT-**  
572 **PCR) performed with the DNase-treated RNA samples using gene-specific primers spanning exon-**  
573 **exon junctions that include large introns in the corresponding genomic sequence to avoid genomic**  
574 **DNA amplification. Gene expression was calculated by  $\Delta\Delta C_t$  method using GAPDH as an internal**  
575 **control. The expression of each gene is shown as the fold change relative to MCF10A. All reactions**  
576 **were done in triplicate and the experiment was repeated twice. Data were plotted as mean  $\pm$  SD.**  
577 **A, *ESR2* genes; full length (left) and all isoforms (right). B, *ESR1*. C, whole-cell lysates were**  
578 **extracted and immunoblot analyses were performed for ER $\beta$  and GAPDH (loading control) (upper**  
579 **panel), and ER $\alpha$  and GAPDH (lower panel). Intensity of the protein bands was quantified using**

580 Image Studio (LiCor) software. Numbers under the lanes of each cell line represent normalized  
581 values of the corresponding protein band (ER $\beta$  or ER $\alpha$ ). Normalized band intensity of MCF10A  
582 was considered as 1. Immunoblot analyses were repeated twice with corresponding biological  
583 replicates. Reproducible results were obtained in each independent experiment. GAPDH,  
584 glyceraldehyde-3-phosphate dehydrogenase. For ER $\beta$  (upper panel) two different exposures were  
585 provided; low exp.= low exposure; high exp.= higher exposure of the blot **D, ERE-Luciferase**  
586 **driven promoter activity upon treatment with selective ER $\beta$  agonists is significantly higher**  
587 **in ectopically expressing cells with ER $\beta$  compared to that of ER $\alpha$ .** HEK293T cells were  
588 transfected with c-Flag pcDNA3 (vector control), c-Flag ER $\alpha$  or c-Flag ER $\beta$  in combination with  
589 ERE-Luciferase (reporter) and TK-renilla (pRLTK; internal control) plasmids (as described in  
590 Materials and Methods section). Forty eight hours after treatment of the cells with ER $\beta$  specific  
591 agonists Renilla and Firefly luciferase activities were measured using the dual-luciferase reporter  
592 assay system. Renilla luciferase was normalized to Firefly luciferase. Treatment with: OSU-ERb-  
593 12 (0-10  $\mu$ mol/L) (left) and LY500307 (0-10  $\mu$ mol/L) (middle). Each assay was performed in  
594 triplicate with three experimental replicates. (mean  $\pm$ SD, \*: p<0.05, \*\*: p<0.01). Right panel  
595 shows equal expression of ER $\alpha$  and ER $\beta$  as determined by western blot analysis using anti-flag  
596 antibody. Intensity of Flag-ER $\alpha$ /ER $\beta$  was normalized to GAPDH. The numbers under the  
597 corresponding protein band represent normalized values of the corresponding protein band  
598 intensity.

599 **Figure 2: Selective ER $\beta$  agonists demonstrate significant cytotoxicity in ER $\alpha$ + parental and**  
600 **respective endocrine resistant breast cancer cell lines.** Cytotoxicity assays were performed on  
601 immortalized MCF10A, ER positive MCF7 and T47D, endocrine resistant MCF7 and T47D,  
602 CDK4/6 inhibitor resistant MCF7 and T47D, and CDK6 over-expressing MCF7 (MCF7-CDK6  
603 O/E) cells. Viable cells were measured after seven days of treatment with DMSO (control) or the  
604 drugs at the indicated concentrations using CellTiterGlo assay. The percentage of viable cells is  
605 shown relative to DMSO vehicle-treated controls (mean  $\pm$  SD, \*: p<0.05, \*\*: p<0.01). Assays  
606 were performed in quadruplicates (three experimental replicates). Cell viability assay performed  
607 after treatment with: **A & C**, OSU-ERb-12 **B & D**, LY500307. TamR= Tamoxifen resistant,  
608 FasR=Fulvestrant resistant, CDK6 O/E= CDK6 overexpressing, CDK4/6iR= CDK4/6 inhibitor  
609 resistant, MPP= methyl-piperidino-pyrazole.

610 **Figure 3: A-C, Combination treatment with selective ER $\beta$  agonists and ER $\alpha$  antagonist**  
611 **demonstrate significant cytotoxicity with reduction of IC50 in ER $\alpha$ + breast cancer cell lines.**  
612 **A**, T47D treated with: OSU-ERb-12 alone and combination with 4-hydroxy tamoxifen, fulvestrant,  
613 elacastrant, or MPP or **B**, OSU-ERb-12 alone, 4-hydroxy tamoxifen alone, and OSU-ERb-12 in  
614 combination with 4-hydroxy tamoxifen **C**, Linear mixed models were fit for viability versus  
615 regimen for each dose, with random effects accounting for within-batch correlation. Bliss  
616 independence model predictions are products of fitted values for 4-hydroxy tamoxifen and OSU-  
617 ERb-12. Error bars are 95% confidence intervals. (**left**); The ratio of predicted viabilities (Bliss  
618 independence / Combination 4-hydroxy tamoxifen + OSU-ERb-12) quantifies interaction, with  
619 ratios >1 indicating synergy. Error bars are 95% confidence intervals (**right**). **D**, T47D treated  
620 with: OSU-ERb-12 and MCSR-18-006 (**left**), combination of OSU-ERb-12/MCSR-18-006 with  
621 4-hydroxy tamoxifen (**right**). Viable cells were measured after seven days of treatment with  
622 DMSO (control) or the drugs at the indicated concentrations using CellTiterGlo assay. The

623 percentage of viable cells is shown relative to DMSO vehicle-treated controls (mean  $\pm$  SD, \*:   
624  $p < 0.05$ , \*\*:  $p < 0.01$ ). Assays were performed in quadruplicates (three experimental replicates).

625 **Figure 4: Cell proliferation, cell cycle and apoptosis are affected upon treatment of ER $\alpha$ +  
626 breast cancer cells with ER $\beta$  specific agonists, OSU-ERb-12 and LY500307.** MCF7 and T47D  
627 cells ( $0.5 \times 10^6$ ) were seeded on 100 mm dishes in phenol red free DMEM containing charcoal  
628 stripped FBS and treated with the drugs as indicated. **A**, a representative diagram of cell  
629 proliferation profile in drug-treated cells. Cells were treated with DMSO (control), FAS  
630 (Fulvestrant; negative control), OSU-ERb-12 or LY500307 for 72 hours, harvested, and stained  
631 following protocol for the Click-iT Edu Alexa Fluor 647 kit (Invitrogen C10424). Cell  
632 proliferation was analyzed via flow cytometry on BD FACSCalibur Flow Cytometer. Each assay  
633 was performed in triplicate and repeated twice. Data were plotted as mean  $\pm$  SD (\*:  $p < 0.05$ , \*\*:   
634  $p < 0.01$ ) **B**, a representative diagram depicting cell cycle profile in drug-treated cells. Cells treated  
635 with DMSO (control), OSU-ERb-12 or LY500307 for 72 hours at the indicated concentrations  
636 were harvested on ice, fixed, washed, and incubated with propidium iodide and RNase A followed  
637 by cell cycle analysis in a flow cytometer. Each assay was performed in triplicate and repeated  
638 twice. Data were plotted as mean  $\pm$  SD (\*:  $p < 0.05$ , \*\*:  $p < 0.01$ , \*\*\*:  $p < 0.001$ ) **C**, a representative  
639 diagram depicting apoptosis profile in drug-treated cells. Cells treated with DMSO (control), OSU-  
640 ERb-12 or LY500307 for 48 hours at the indicated concentrations were harvested on ice, washed,  
641 and processed according to the manufacturer's protocol (TUNEL Assay Kit-BrdU-Red; Abcam)  
642 followed by analysis on a BD FACSCalibur Flow Cytometer. Each experiment was repeated twice.  
643 Data presented are mean  $\pm$  SD (\*:  $p < 0.05$ , \*\*:  $p < 0.01$ ).

644 **Figure 5: Treatment with ER $\beta$  specific agonists, OSU-ERb-129 and LY500307 promotes  
645 global anticancer effects in ER $\alpha$ + breast cancer in vitro.** **A**, colony formation. Colonies were  
646 stained with crystal violet and counted. The percentage of colonies present in each treatment is  
647 shown relative to DMSO vehicle-treated controls. Data are from three independent experiments  
648 and presented as mean  $\pm$  SD; \*:  $p < 0.05$ , \*\*:  $p < 0.01$ , \*\*\*:  $p < 0.001$ ;  $n = 3$ . **B**, cell migration. Cell  
649 migration was determined using the wound-healing assay. The percentage of filled area is  
650 calculated, normalized to DMSO treated control and presented as mean  $\pm$  SD from three  
651 independent experiments; mean  $\pm$  SD; \*:  $p < 0.05$ , \*\*:  $p < 0.01$ , \*\*\*:  $p < 0.001$ ;  $n = 3$ . **C**, Enhanced  
652 cleavage of PARP-1, and activation of caspases 3 and 7 in ER $\alpha$ + breast cancer cells upon treatment  
653 with ER $\beta$  agonists. Western blot analyses were performed using specific antibodies in whole cell  
654 lysates prepared from OSU-ERb-12 and LY500307 treated cells as indicated. Similar results were  
655 obtained in different batches of cells treated with OSU-ERb-12 and LY500307. Numbers under  
656 the lanes are quantitative representation of the intensity of the normalized bands. The signal in  
657 each band was quantified using Image Studio (LiCor) software. **D**, Enhanced expression of  
658 FOXO1 and FOXO3a proteins in ER $\alpha$ + breast cancer cells upon treatment with ER $\beta$  agonists.  
659 Western blot analyses were performed using specific antibodies in whole cell lysates prepared  
660 from cells treated for 7 days with OSU-ERb-12 or LY500307. Similar results were obtained with  
661 different batches of cells treated with OSU-ERb-12 or LY500307. Numbers under the lanes  
662 represent corresponding normalized band intensity of the respective proteins. Image Studio  
663 (LiCor) software was used to quantify the intensity of the protein bands.

664 **Figure 6. A-B**, Expression of the genes that are targets of ER-AP1 mediated transcription and AP1  
665 independent ERE mediated transcription in metastatic HER2 negative ER+ breast cancer patients  
666 is positively correlated with ESR2. **A**, ESR2 is positively correlated with CXCL12 and IGFBP4,



667 and negatively correlated with CCND1, EBAG9, and ESR1, B, ESR1 is positively correlated with  
668 PGR and negatively correlated with CXCL12, E2F4, IGFBP4, and ESR2. Expression levels  
669 (FPKM), and Spearman correlation coefficients were computed for ESR1 and ESR2 versus other  
670 gene expression levels. C, Overall survival was not significantly correlated with the expression of  
671 ESR2 in the HER2 negative ER $\alpha$ + metastatic breast cancer patient cohort, although there was a  
672 trend towards positive correlation. ESR2 was dichotomized relative to the median expression level  
673 and tested via the log-rank test ( $p = 0.6$ ). Cox proportional hazards regression on the continuous  
674 expression levels yielded similar results (HR 0.6,  $p = 0.7$ ).

## 675 **Author Contributions**

676 MAC and JD conceived the project. JD, CCC, BR, and MAC designed the experiments. BR, ML,  
677 DGS, SDS, and MAC helped recruit the patients to the protocol under which the patient data were  
678 collected. JD, NW, JMM, PS, MS, JJD, DGS, and MK performed the experiments and analyzed  
679 the data. JD and MAC wrote the manuscript and all other authors reviewed and edited the  
680 manuscript.

## 681 **Funding**

682 This publication [or project] was supported, in part, by the National Center for Advancing  
683 Translational Sciences of the National Institutes of Health under Grant Number **KL2TR002734**.  
684 OSU-ERb-12 and MCSR-18-006 were synthesized by the Medicinal Chemistry Shared Resource  
685 and the corresponding mass spectral data were obtained by the Proteomics Shared Resource, both  
686 of which are part of The Ohio State University Comprehensive Cancer Center and supported by  
687 NCI/NIH Grant P30CA016058. This work was also supported by the Drug Development Institute  
688 within The Ohio State University Comprehensive Cancer Center and Pelotonia. The content is  
689 solely the responsibility of the authors and does not necessarily represent the official views of the  
690 National Institutes of Health.

## 691 **Acknowledgements**

692 We would like to like to thank the Comprehensive Cancer Center, Arthur G. James Cancer  
693 Hospital and Richard Solove Research Institute at the Ohio State University Wexner Medical  
694 Center for supporting the study. We also would like to acknowledge Jackie Sharpnack for  
695 administrative support.

## 696 **Conflict of Interest Statement**

697 The authors declare that the research was conducted in the absence of any commercial or financial  
698 relationships that could be construed as a potential conflict of interest.

## 699 **References**

- 700 1. Sung H, Ferlay J, Siegel RL, Laversanne M, Soerjomataram I, Jemal A, et al. Global  
701 Cancer Statistics 2020: GLOBOCAN Estimates of Incidence and Mortality Worldwide  
702 for 36 Cancers in 185 Countries. *CA Cancer J Clin* (2021) 71(3):209-49.  
703 doi:10.3322/caac.21660

- 704 2. Gong Y, Liu YR, Ji P, Hu X, Shao ZM. Impact of molecular subtypes on metastatic  
705 breast cancer patients: a SEER population-based study. *Sci Rep* (2017) 7:45411.  
706 doi:10.1038/srep45411
- 707 3. Li Z, Razavi P, Li Q, Toy W, Liu B, Ping C, et al. Loss of the FAT1 Tumor suppressor  
708 promotes resistance to CDK4/6 inhibitors via the hippo pathway. *Cancer Cell* (2018)  
709 34(6):893-905. doi:10.1016/j.ccell.2018.11.006
- 710 4. Cornell L, Wander SA, Visal T, Wagle N, Shapiro GI. MicroRNA-mediated suppression  
711 of the TGF-beta pathway confers transmissible and reversible CDK4/6 inhibitor  
712 resistance. *Cell Rep* (2019) 26(10):2667-80. doi:10.1016/j.celrep.2019.02.023
- 713 5. Pandey K, Park N, Park KS, Hur J, Cho YB, Kang M, et al. Combined CDK2 and  
714 CDK4/6 Inhibition overcomes palbociclib resistance in breast cancer by enhancing  
715 senescence. *Cancers* (Basel) (2020) 12(12): 3566. doi:10.3390/cancers12123566
- 716 6. Russo J, Russo IH. The role of estrogen in the initiation of breast cancer. *J Steroid*  
717 *Biochem Mol Biol* (2006) 102(1-5):89-96. doi:10.1016/j.jsbmb.2006.09.004
- 718 7. Mal R, Magner A, David J, Datta J, Vallabhaneni M, Kassem M, et al. Estrogen Receptor  
719 Beta (ERbeta): A ligand activated tumor suppressor. *Front Oncol* (2020) 10:587386.  
720 doi:10.3389/fonc.2020.587386
- 721 8. Pinton G, Thomas W, Bellini P, Manente AG, Favoni RE, Harvey BJ, et al. Estrogen  
722 receptor beta exerts tumor repressive functions in human malignant pleural mesothelioma  
723 via EGFR inactivation and affects response to gefitinib. *PLoS One* (2010) 5(11):e14110.  
724 doi:10.1371/journal.pone.0014110
- 725 9. Ma L, Liu Y, Geng C, Qi X, Jiang J. Estrogen receptor beta inhibits estradiol-induced  
726 proliferation and migration of MCF-7 cells through regulation of mitofusin 2. *Int J Oncol*  
727 (2013) 42(6):1993-2000. doi:10.3892/ijo.2013.1903
- 728 10. Pinton G, Zonca S, Manente AG, Cavaletto M, Borroni E, Daga A, et al. SIRT1 at the  
729 crossroads of AKT1 and ERbeta in malignant pleural mesothelioma cells. *Oncotarget*  
730 (2016) 7(12):14366-79. doi:10.18632/oncotarget.7321
- 731 11. Deroo BJ, Buensuceso AV. Minireview: Estrogen receptor-beta: mechanistic insights  
732 from recent studies. *Mol Endocrinol* (2010) 24(9):1703-14. doi:10.1210/me.2009-0288
- 733 12. Huang J, Li X, Maguire CA, Hilf R, Bambara RA, Muyan M. Binding of estrogen  
734 receptor beta to estrogen response element in situ is independent of estradiol and  
735 impaired by its amino terminus. *Mol Endocrinol* (2005) 19(11):2696-712.  
736 doi:10.1210/me.2005-0120
- 737 13. Chang EC, Charn TH, Park SH, Helferich WG, Komm B, Katzenellenbogen JA, et al.  
738 Estrogen receptors alpha and beta as determinants of gene expression: influence of  
739 ligand, dose, and chromatin binding. *Mol Endocrinol* (2008) 22(5):1032-43.  
740 doi:10.1210/me.2007-0356
- 741 14. Kuiper GGJM, Enmark E, Peltö-Huikko M, Nilsson S, Gustafsson JA. Cloning of a novel  
742 estrogen receptor expressed in rat prostate and ovary. *Proc Natl Acad Sci USA* (1996)  
743 93:5925-30.
- 744 15. Harrington WR, Sheng S, Barnett DH, Petz LN, Katzenellenbogen JA, Katzenellenbogen  
745 BS. Activities of estrogen receptor alpha- and beta-selective ligands at diverse estrogen  
746 responsive gene sites mediating transactivation or transrepression. *Mol Cell Endocrinol*  
747 (2003) 206(1-2):13-22. doi:10.1016/s0303-7207(03)00255-7

- 748 16. Sedlak D, Wilson TA, Tjarks W, Radomska HS, Wang H, Kolla JN, et al. Structure-  
749 activity relationship of para-carborane selective estrogen receptor beta agonists. *J Med*  
750 *Chem* (2021) 64(13):9330-53. doi:10.1021/acs.jmedchem.1c00555
- 751 17. Beretta GL, Corno C, Zaffaroni N, Perego P. Role of foxO proteins in cellular response  
752 to antitumor agents. *Cancers (Basel)* (2019) 11(1). doi:10.3390/cancers11010090
- 753 18. Hoffmann J, Bohlmann R, Heinrich N, Hofmeister H, Kroll J, Kunzer H, et al.  
754 Characterization of new estrogen receptor destabilizing compounds: effects on estrogen-  
755 sensitive and tamoxifen-resistant breast cancer. *J Natl Cancer Inst* (2004) 96(3):210-8.  
756 doi:10.1093/jnci/djh022
- 757 19. Mishra AK, Abrahamsson A, Dabrosin C. Fulvestrant inhibits growth of triple negative  
758 breast cancer and synergizes with tamoxifen in ERalpha positive breast cancer by up-  
759 regulation of ERbeta. *Oncotarget* (2016) 7(35):56876-88. doi:10.18632/oncotarget.10871
- 760 20. George S, Petit GH, Gouras GK, Brundin P, Olsson R. Nonsteroidal selective androgen  
761 receptor modulators and selective estrogen receptor beta agonists moderate cognitive  
762 deficits and amyloid-beta levels in a mouse model of Alzheimer's disease. *ACS Chem*  
763 *Neurosci* (2013) 4(12):1537-48. doi:10.1021/cn400133s
- 764 21. Hughes ZA, Liu F, Platt BJ, Dwyer JM, Pulicicchio CM, Zhang G, et al. WAY-200070, a  
765 selective agonist of estrogen receptor beta as a potential novel anxiolytic/antidepressant  
766 agent. *Neuropharmacology* (2008) 54(7):1136-42. doi:10.1016/j.neuropharm.2008.03.004
- 767 22. Janicke RU. MCF-7 breast carcinoma cells do not express caspase-3. *Breast Cancer Res*  
768 *Treat* (2009) 117(1):219-21. doi:10.1007/s10549-008-0217-9
- 769 23. Nakajima Y, Akaogi K, Suzuki T, Osakabe A, Yamaguchi C, Sunahara N, et al. Estrogen  
770 regulates tumor growth through a nonclassical pathway that includes the transcription  
771 factors ERbeta and KLF5. *Sci Signal* (2011) 4(168):ra22. doi:10.1126/scisignal.2001551
- 772 24. Finn RS, Crown JP, Lang I, Boer K, Bondarenko IM, Kulyk SO, et al. The cyclin-  
773 dependent kinase 4/6 inhibitor palbociclib in combination with letrozole versus letrozole  
774 alone as first-line treatment of oestrogen receptor-positive, HER2-negative, advanced  
775 breast cancer (PALOMA-1/TRIO-18): a randomised phase 2 study. *Lancet Oncol* (2015)  
776 16(1):25-35. doi:10.1016/S1470-2045(14)71159-3
- 777 25. Montagna E, Colleoni M. Hormonal treatment combined with targeted therapies in  
778 endocrine-responsive and HER2-positive metastatic breast cancer. *Ther Adv Med Oncol*  
779 (2019) 11:1758835919894105. doi:10.1177/1758835919894105
- 780 26. Hortobagyi GN, Stemmer SM, Burris HA, Yap YS, Sonke GS, Paluch-Shimon S, et al.  
781 Ribociclib as first-line therapy for HR-positive, advanced breast cancer. *N Engl J Med*  
782 (2016) 375(18):1738-48. doi:10.1056/NEJMoa1609709
- 783 27. Goetz MP, Toi M, Campone M, Sohn J, Paluch-Shimon S, Huober J, et al. MONARCH  
784 3: Abemaciclib as initial therapy for advanced breast cancer. *J Clin Oncol* (2017)  
785 35(32):3638-46. doi:10.1200/JCO.2017.75.6155
- 786 28. Xu XQ, Pan XH, Wang TT, Wang J, Yang B, He QJ, et al. Intrinsic and acquired  
787 resistance to CDK4/6 inhibitors and potential overcoming strategies. *Acta Pharmacol Sin*  
788 (2021) 42(2):171-8. doi:10.1038/s41401-020-0416-4
- 789 29. Osborne CK, Schiff R. Mechanisms of endocrine resistance in breast cancer. *Annu Rev*  
790 *Med* (2011) 62:233-47. doi:10.1146/annurev-med-070909-182917
- 791 30. Murphy LC, Leygue E. The role of estrogen receptor-beta in breast cancer. *Semin Reprod*  
792 *Med* (2012) 30(1):5-13. doi:10.1055/s-0031-1299592

- 793 31. Dey P, Barros RP, Warner M, Strom A, Gustafsson JA. Insight into the mechanisms of  
794 action of estrogen receptor beta in the breast, prostate, colon, and CNS. *J Mol Endocrinol*  
795 (2013) 51(3):T61-74. doi:10.1038/onc.2013.384
- 796 32. Zhao L, Huang S, Mei S, Yang Z, Xu L, Zhou N, et al. Pharmacological activation of  
797 estrogen receptor beta augments innate immunity to suppress cancer metastasis. *Proc*  
798 *Natl Acad Sci U S A* (2018) 115(16):E3673-E81. doi:10.1073/pnas.1803291115
- 799 33. Sareddy GR, Li X, Liu J, Viswanadhapalli S, Garcia L, Gruslova A, et al. Selective  
800 estrogen receptor beta agonist LY500307 as a novel therapeutic agent for glioblastoma.  
801 *Sci Rep* (2016) 6:24185. doi:10.1038/srep24185
- 802 34. Roehrborn CG, Spann ME, Myers SL, Serviss CR, Hu L, Jin Y. Estrogen receptor beta  
803 agonist LY500307 fails to improve symptoms in men with enlarged prostate secondary to  
804 benign prostatic hypertrophy. *Prostate Cancer Prostatic Dis* (2015) 18(1):43-8.  
805 doi:10.1038/pcan.2014.43
- 806 35. Anolik JH, Klinge CM, Bambara RA, Hilf R. Differential impact of flanking sequences  
807 on estradiol- vs 4-hydroxytamoxifen-liganded estrogen receptor binding to estrogen  
808 responsive element DNA. *J Steroid Biochem Mol Biol* (1993) 46(6):713-30.  
809 doi:10.1016/0960-0760(93)90312-k
- 810 36. Anolik JH, Klinge CM, Hilf R, Bambara RA. Cooperative binding of estrogen receptor to  
811 DNA depends on spacing of binding sites, flanking sequence, and ligand. *Biochemistry*  
812 (1995) 34(8):2511-20. doi:10.1021/bi00008a015
- 813 37. Klinge CM, Studinski-Jones AL, Kulakosky PC, Bambara RA, Hilf R. Comparison of  
814 tamoxifen ligands on estrogen receptor interaction with estrogen response elements. *Mol*  
815 *Cell Endocrinol* (1998) 143(1-2):79-90. doi:10.1016/s0303-7207(98)00130-0
- 816 38. Anolik JH, Klinge CM, Brolly CL, Bambara RA, Hilf R. Stability of the ligand-estrogen  
817 receptor interaction depends on estrogen response element flanking sequences and  
818 cellular factors. *J Steroid Biochem Mol Biol* (1996) 59(5-6):413-29. doi:10.1016/s0960-  
819 0760(96)00129-x
- 820 39. Yang JY, Zong CS, Xia W, Yamaguchi H, Ding Q, Xie X, et al. ERK promotes  
821 tumorigenesis by inhibiting FOXO3a via MDM2-mediated degradation. *Nat Cell Biol*  
822 (2008) 10(2):138-48. doi:10.1038/ncb1676
- 823 40. Zou Y, Tsai WB, Cheng CJ, Hsu C, Chung YM, Li PC, et al. Forkhead box transcription  
824 factor FOXO3a suppresses estrogen-dependent breast cancer cell proliferation and  
825 tumorigenesis. *Breast Cancer Res* (2008) 10(1):R21. doi:10.1186/bcr1872
- 826 41. Dey P, Strom A, Gustafsson JA. Estrogen receptor beta upregulates FOXO3a and causes  
827 induction of apoptosis through PUMA in prostate cancer. *Oncogene* (2014) 33(33):4213-  
828 25. doi:10.1186/bcr1872
- 829 42. Nakajima Y, Osakabe A, Waku T, Suzuki T, Akaogi K, Fujimura T, et al. Estrogen  
830 Exhibits a Biphasic Effect on Prostate Tumor Growth through the Estrogen Receptor  
831 beta-KLF5 Pathway. *Mol Cell Biol* (2016) 36(1):144-56. doi:10.1128/MCB.00625-15
- 832 43. Maruyama S, Fujimoto N, Asano K, Ito A. Suppression by estrogen receptor beta of AP-  
833 1 mediated transactivation through estrogen receptor alpha. *J Steroid Biochem Mol Biol*  
834 (2001) 78(2):177-84. doi:10.1016/s0960-0760(01)00083-8
- 835 44. Liu MM, Albanese C, Anderson CM, Hilty K, Webb P, Uht RM, et al. Opposing action  
836 of estrogen receptors alpha and beta on cyclin D1 gene expression. *J Biol Chem* (2002)  
837 277(27):24353-60. doi:10.1074/jbc.M201829200

838 45. Chewchuk S, Guo B, Parissenti AM. Alterations in estrogen signalling pathways upon  
839 acquisition of anthracycline resistance in breast tumor cells. *PLoS One* (2017)  
840 12(2):e0172244. doi:10.1371/journal.pone.0172244

841

**Figure 1**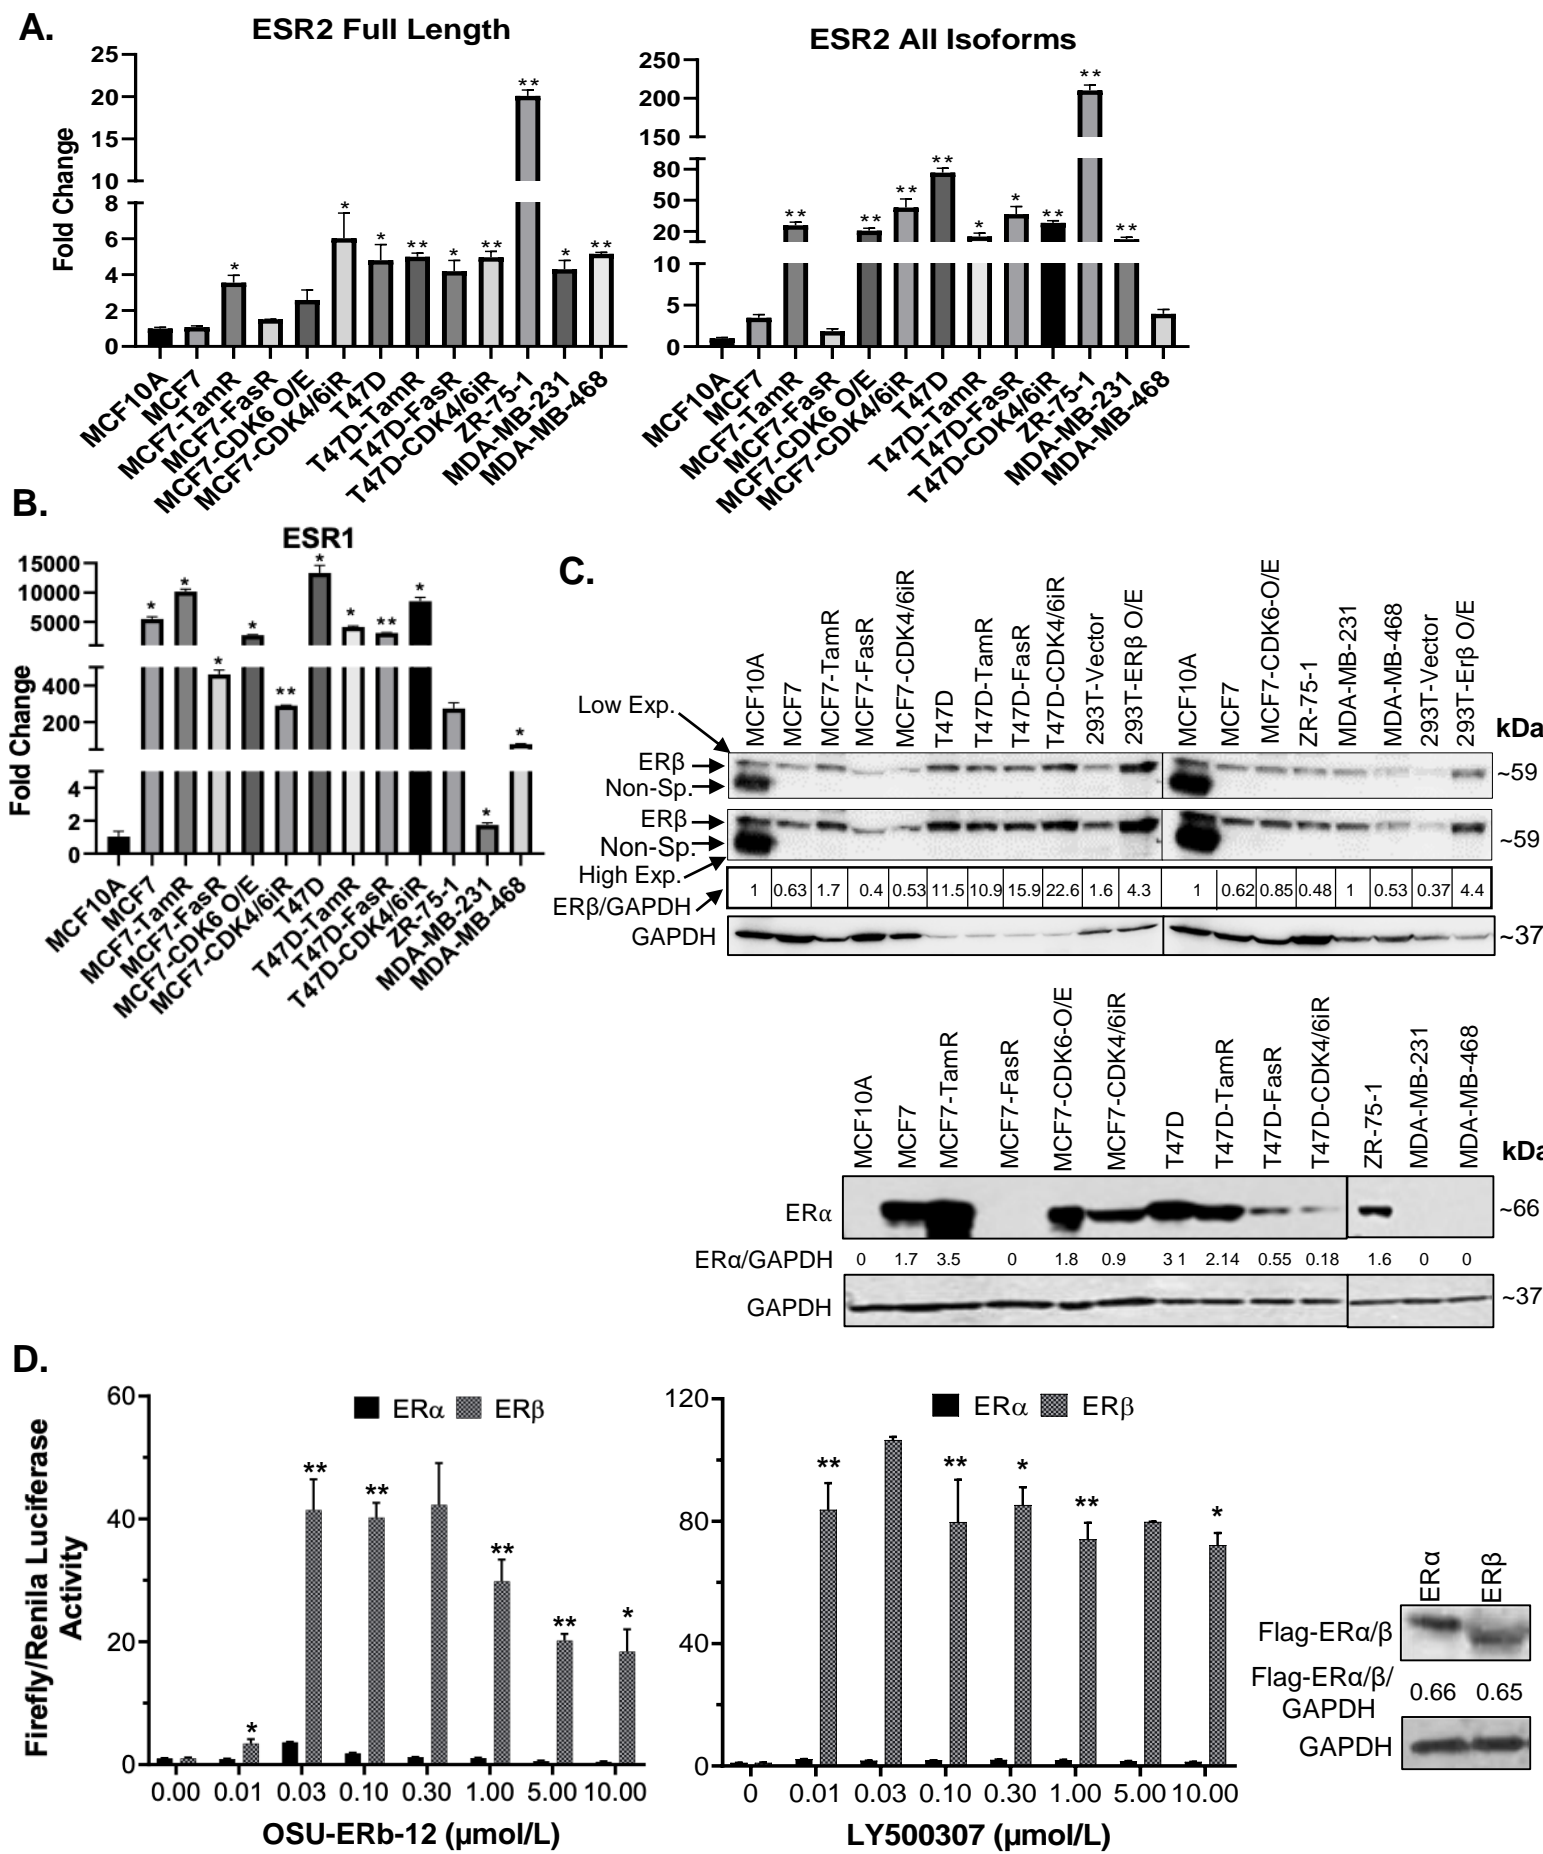

# Figure 2

## A.

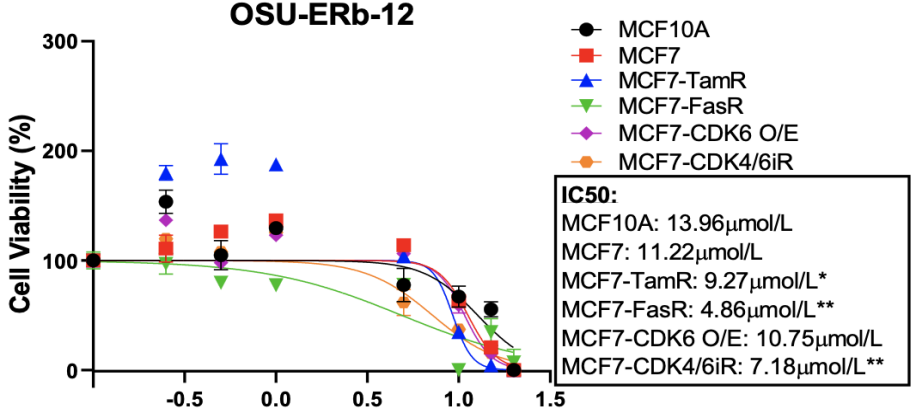

## B.

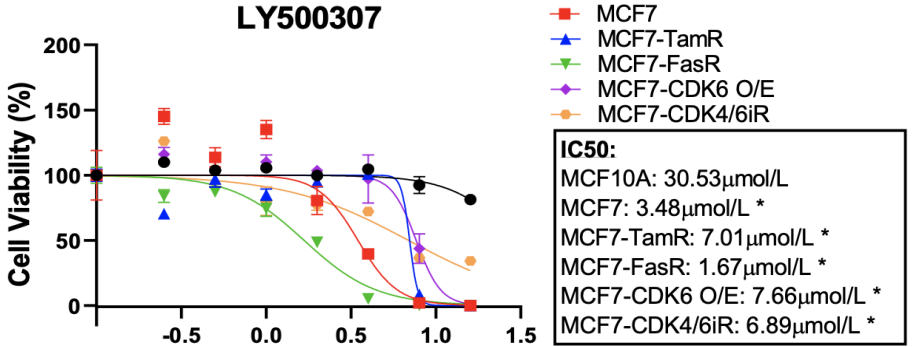

## C.

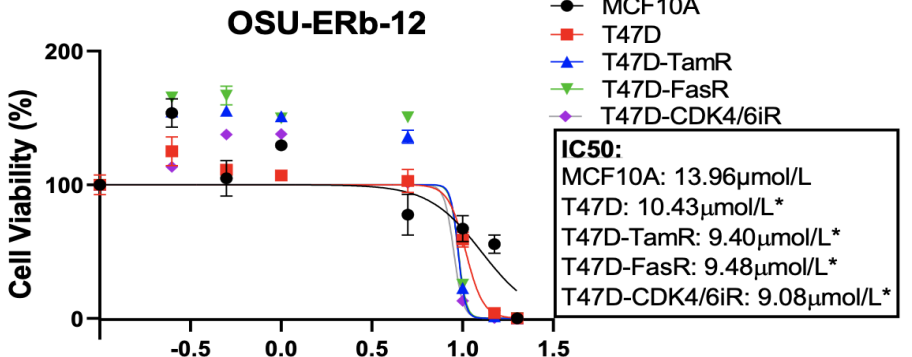

## D.

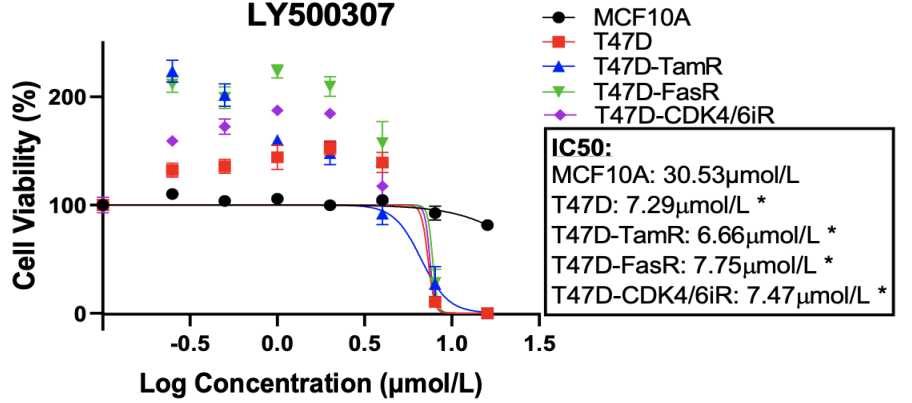

**Figure 3****A.**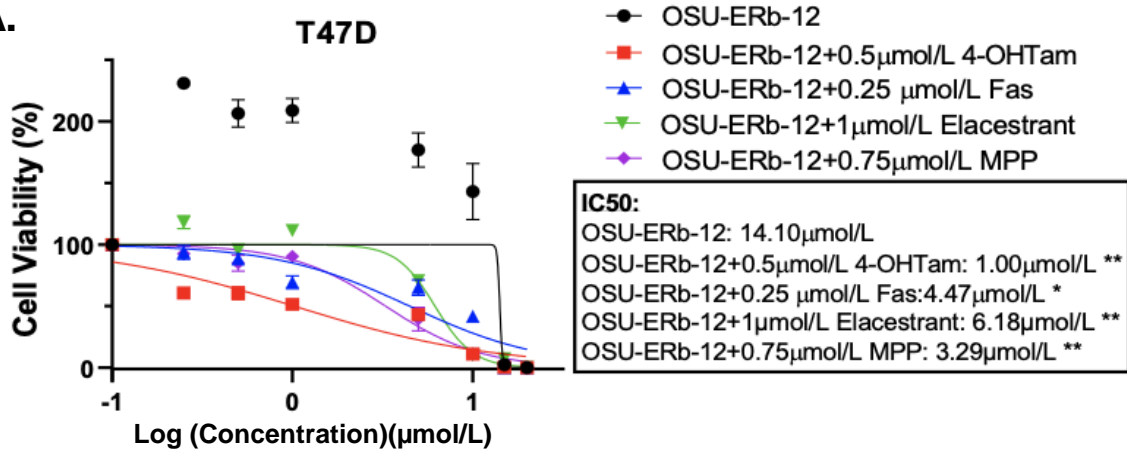**B.**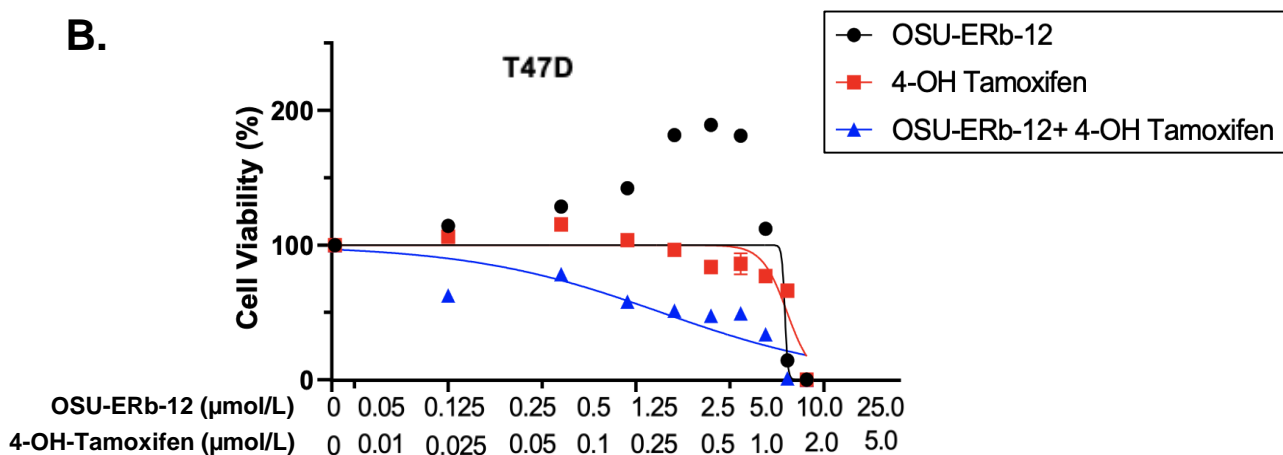**C.**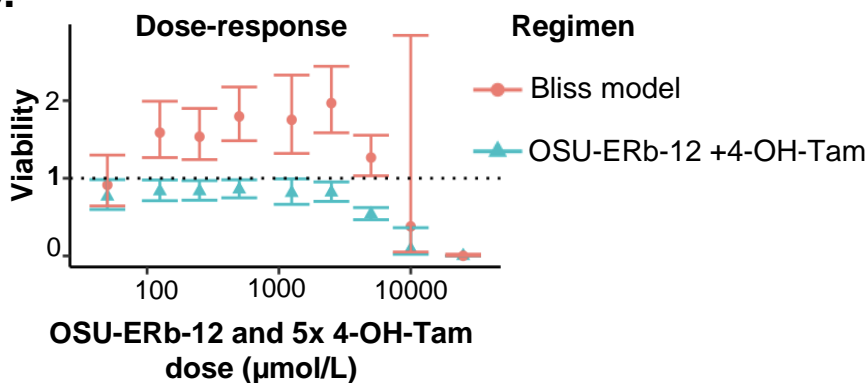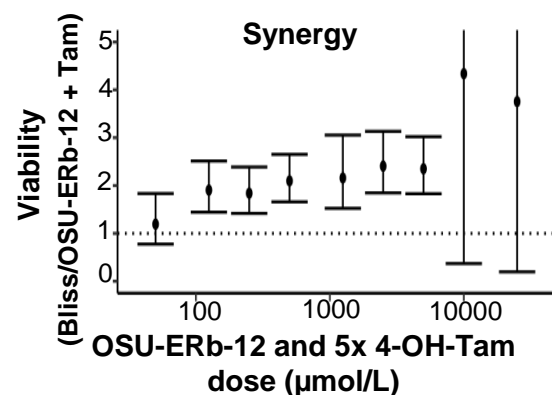**D.**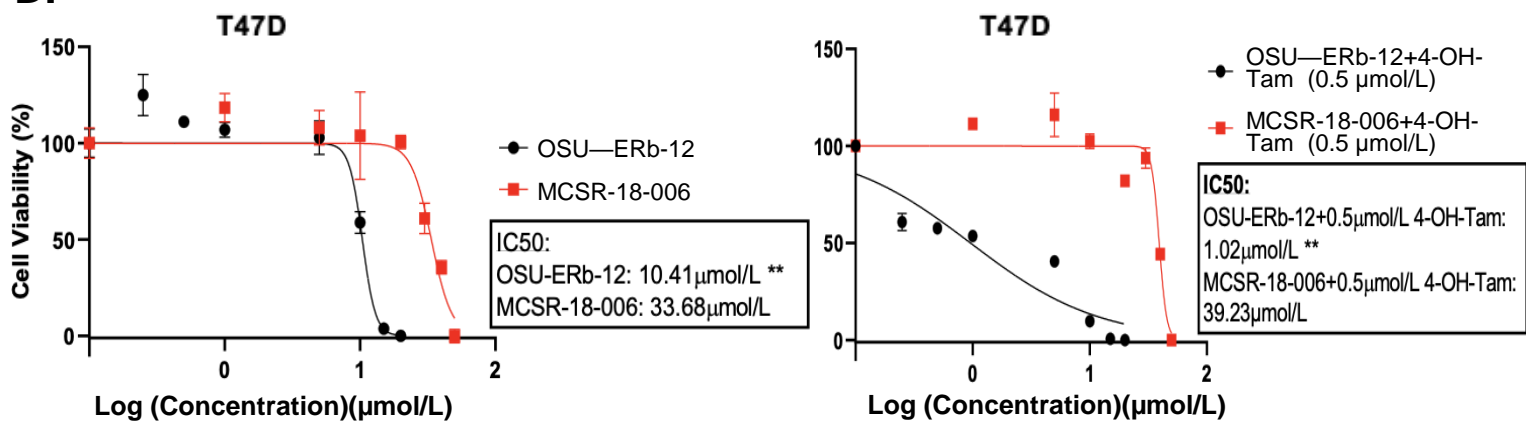



# Figure 4

## A. Cell proliferation

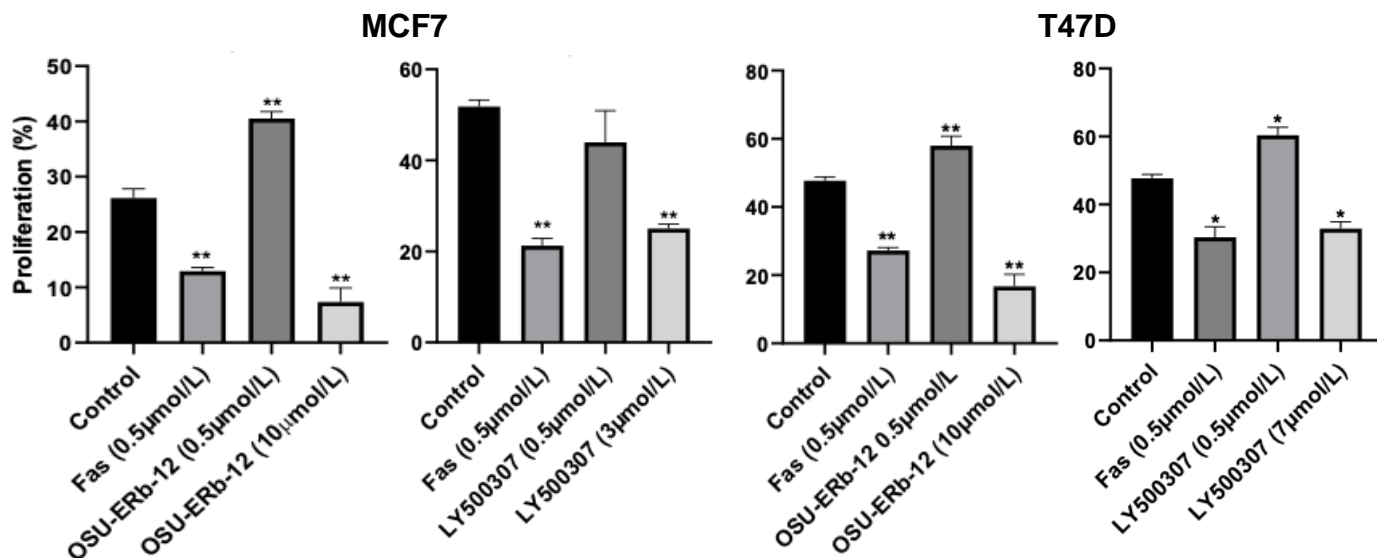

## B. Cell Cycle Analysis

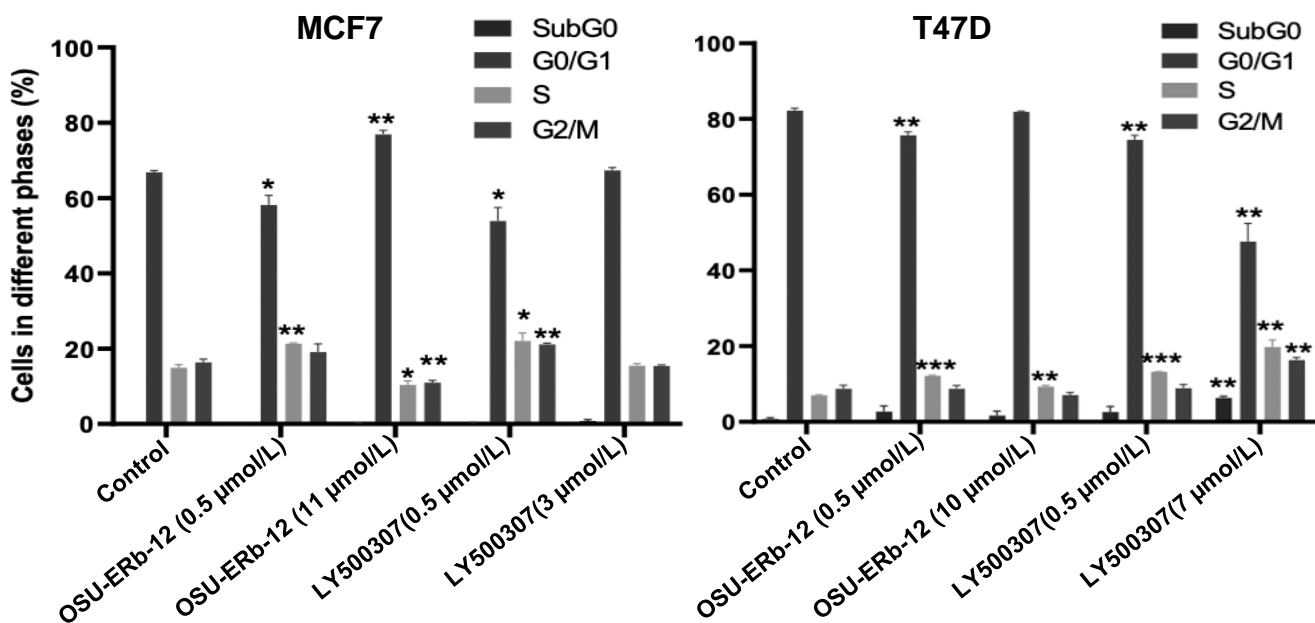

## C. Apoptosis

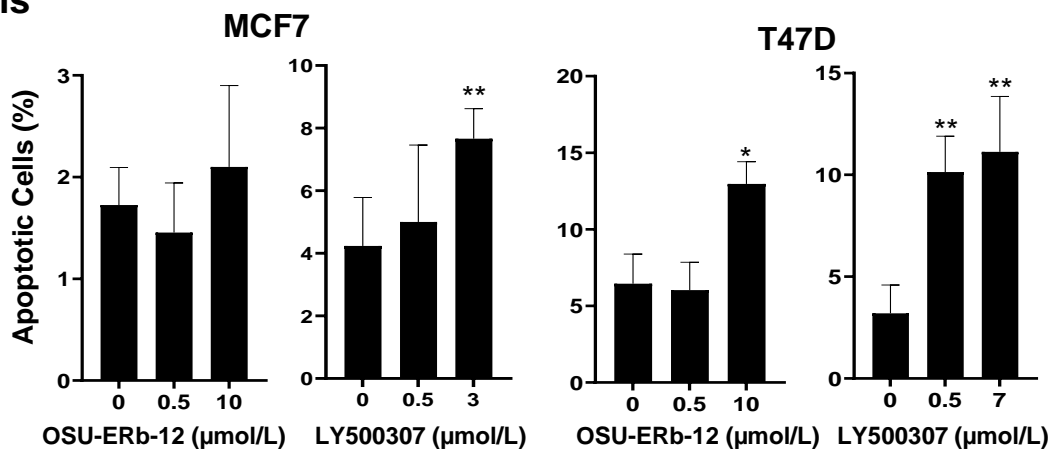

# Figure 5

## A. Colony Formation Assay

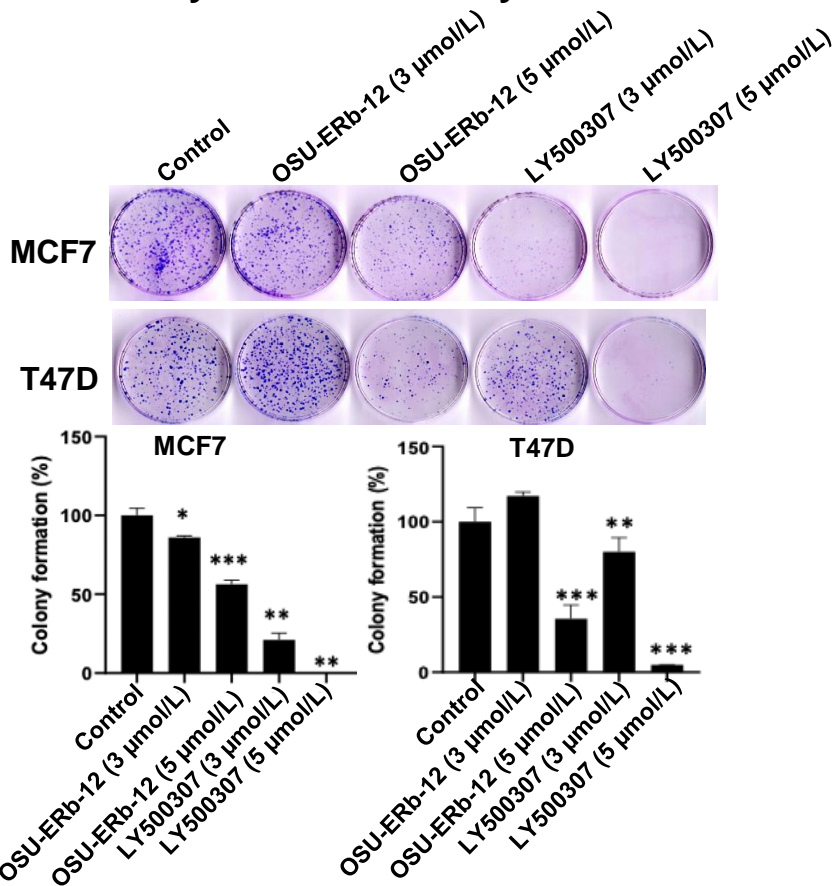

## B. Cell Migration Assay

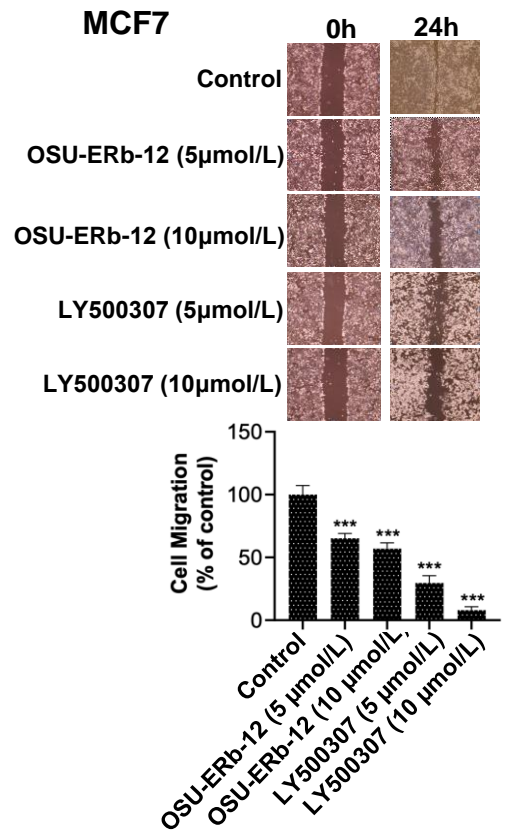

## C. MCF7

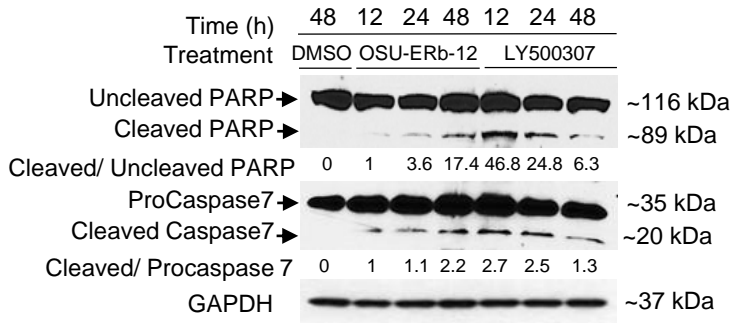

## T47D

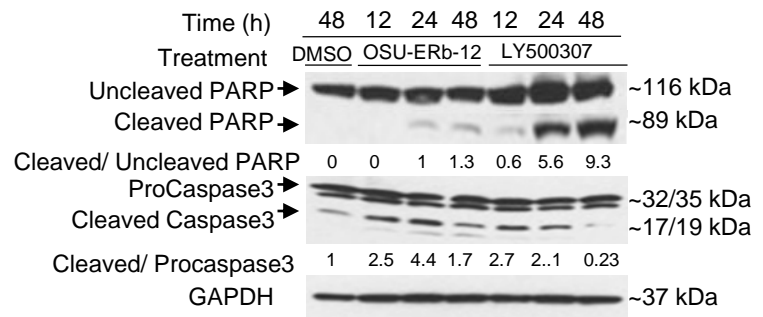

## D.

### MCF7

### T47D

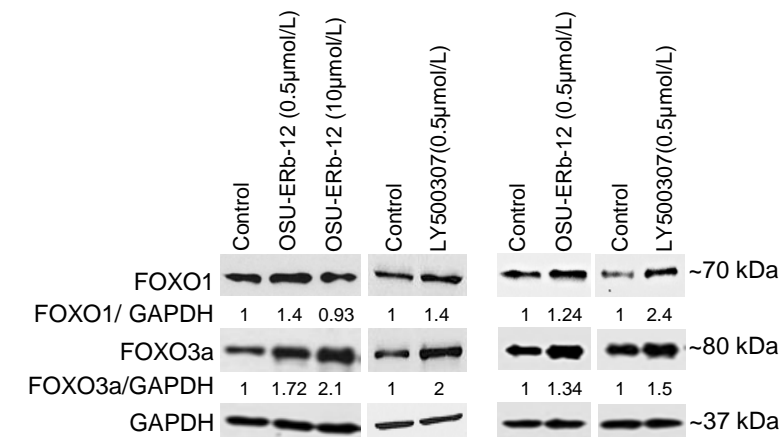

**Figure 6****A.**

Correlations with ESR2

|        | Spearman correlation | p-value |
|--------|----------------------|---------|
| BCL2   | -0.04                | 0.795   |
| CCND1  | -0.45                | 0.005   |
| CXCL12 | 0.54                 | <0.001  |
| E2F4   | -0.04                | 0.800   |
| EBAG9  | -0.45                | 0.006   |
| ESR1   | -0.35                | 0.033   |
| FN1    | 0.04                 | 0.824   |
| IGFBP4 | 0.58                 | <0.001  |
| IGF1   | 0.02                 | 0.895   |
| MMP1   | -0.02                | 0.925   |
| MYC    | 0.06                 | 0.736   |
| PGR    | -0.26                | 0.126   |
| TRIM25 | -0.29                | 0.086   |

**B.**

Correlations with ESR1

|        | Spearman correlation | p-value |
|--------|----------------------|---------|
| BCL2   | 0.26                 | 0.121   |
| CCND1  | 0.21                 | 0.210   |
| CXCL12 | -0.64                | <0.001  |
| E2F4   | -0.41                | 0.012   |
| EBAG9  | 0.17                 | 0.324   |
| ESR2   | -0.35                | 0.033   |
| FN1    | 0.1                  | 0.553   |
| IGFBP4 | -0.57                | <0.001  |
| IGF1   | -0.29                | 0.081   |
| MMP1   | -0.07                | 0.694   |
| MYC    | -0.24                | 0.146   |
| PGR    | 0.44                 | 0.008   |
| TRIM25 | 0.3                  | 0.071   |

**C.**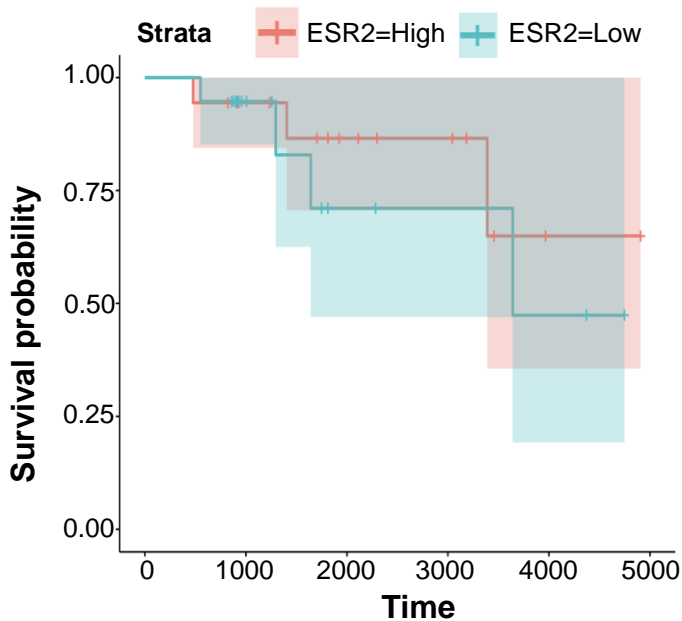

Source: http://biorxiv.org/content/10.1101/2022.01.14.476328v1.full.pdf
